# Supplementary material for: Activation of the Dormant Secondary Metabolite Production by Introducing Gentamicin-Resistance in a Marine-Derived Penicillium purpurogenum G59
Source: MDPI journal article supplement (doi:10.3390/md10030559), 2012-03-02

# Activation of the dormant secondary metabolite production by introducing gentamicin-resistance in a marine-derived *Penicillium purpurogenum* G59

Yun-Jing Chai, Cheng-Bin Cui \*, Chang-Wei Li, Chang-Jing Wu, Cong-Kui Tian and Wei Hua

Prof. Dr. C.-B. Cui, Beijing Institute of Pharmacology and Toxicology, 27 Tai-Ping Road, Haidian District, Beijing 100850, China. E-mail: cuicb@sohu.com, cuicb@126.com; Tel./Fax.: +86-10-6821- 1656.

## Supplementary Data S1 – TLC and HPLC Analysis of EtOAc Extracts of G59 and Its Nine Mutant Cultures

### Contents of Supplementary Data S1

|                                                                                  |            |
|----------------------------------------------------------------------------------|------------|
| 1. HPLC profiles of EtOAc extracts of G59 and its nine mutant cultures.....      | page S1-1  |
| 1.1. Conditions for HPLC performance .....                                       | page S1-1  |
| 1.2. HPLC profiles detected at 210 nm.....                                       | page S1-2  |
| 1.3. HPLC profiles detected at 245 nm.....                                       | page S1-5  |
| 1.4. HPLC profiles detected at 290 nm.....                                       | page S1-8  |
| 1.5. HPLC profiles detected at 350 nm.....                                       | page S1-11 |
| 2. TLC Chromatograms of EtOAc extracts of G59 and its nine mutant cultures ..... | page S1-14 |

### 1. HPLC Profiles of EtOAc Extracts of G59 and Its Nine Mutant Cultures

#### 1.1. Conditions for HPLC Performance

HPLC equipment: Waters HPLC system equipped with Waters 600 controller, Waters 600 pump, Waters 2414 refractive index detector, Waters 2996 photodiode array (PDA) detector and Waters Empower™ software.

HPLC Column: Venusil MP C18 column (5 µm, 100 Å, 4.6 mm × 250 mm; Agela Technologies).

Column temperature: 25°C

Mobile phase: MeOH–H<sub>2</sub>O in linear gradient (20% MeOH at initial time 0 min → 100% MeOH at 60 min → 100% MeOH at 90 min).

Flow rate: 1 ml/min

Data processing: The Data for each HPLC chromatogram at the given wave length were extracted from the acquired PDA data and HPLC profiles were processed using Empower™ PDA software.

## 1.2. HPLC Profiles Detected at 210 nm

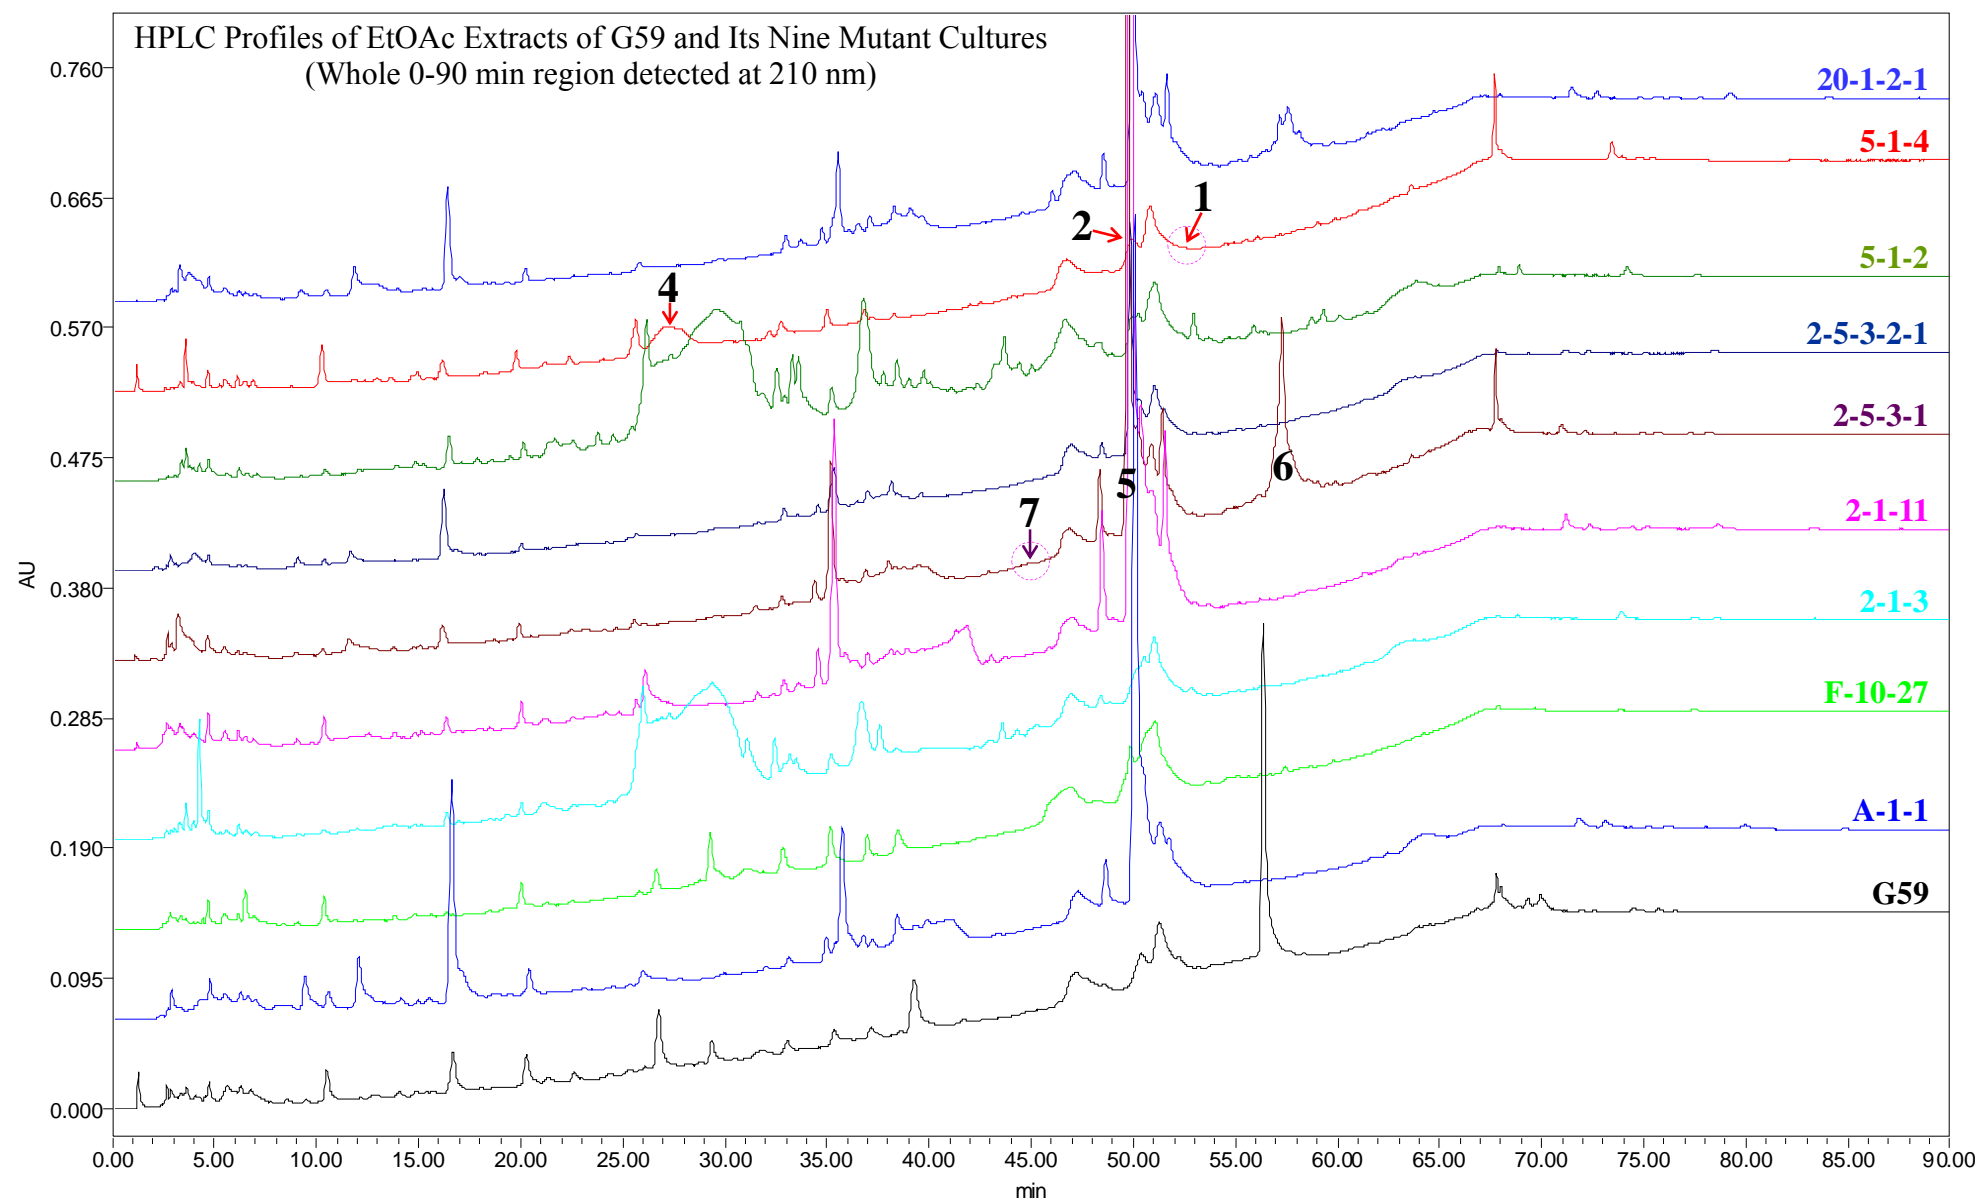

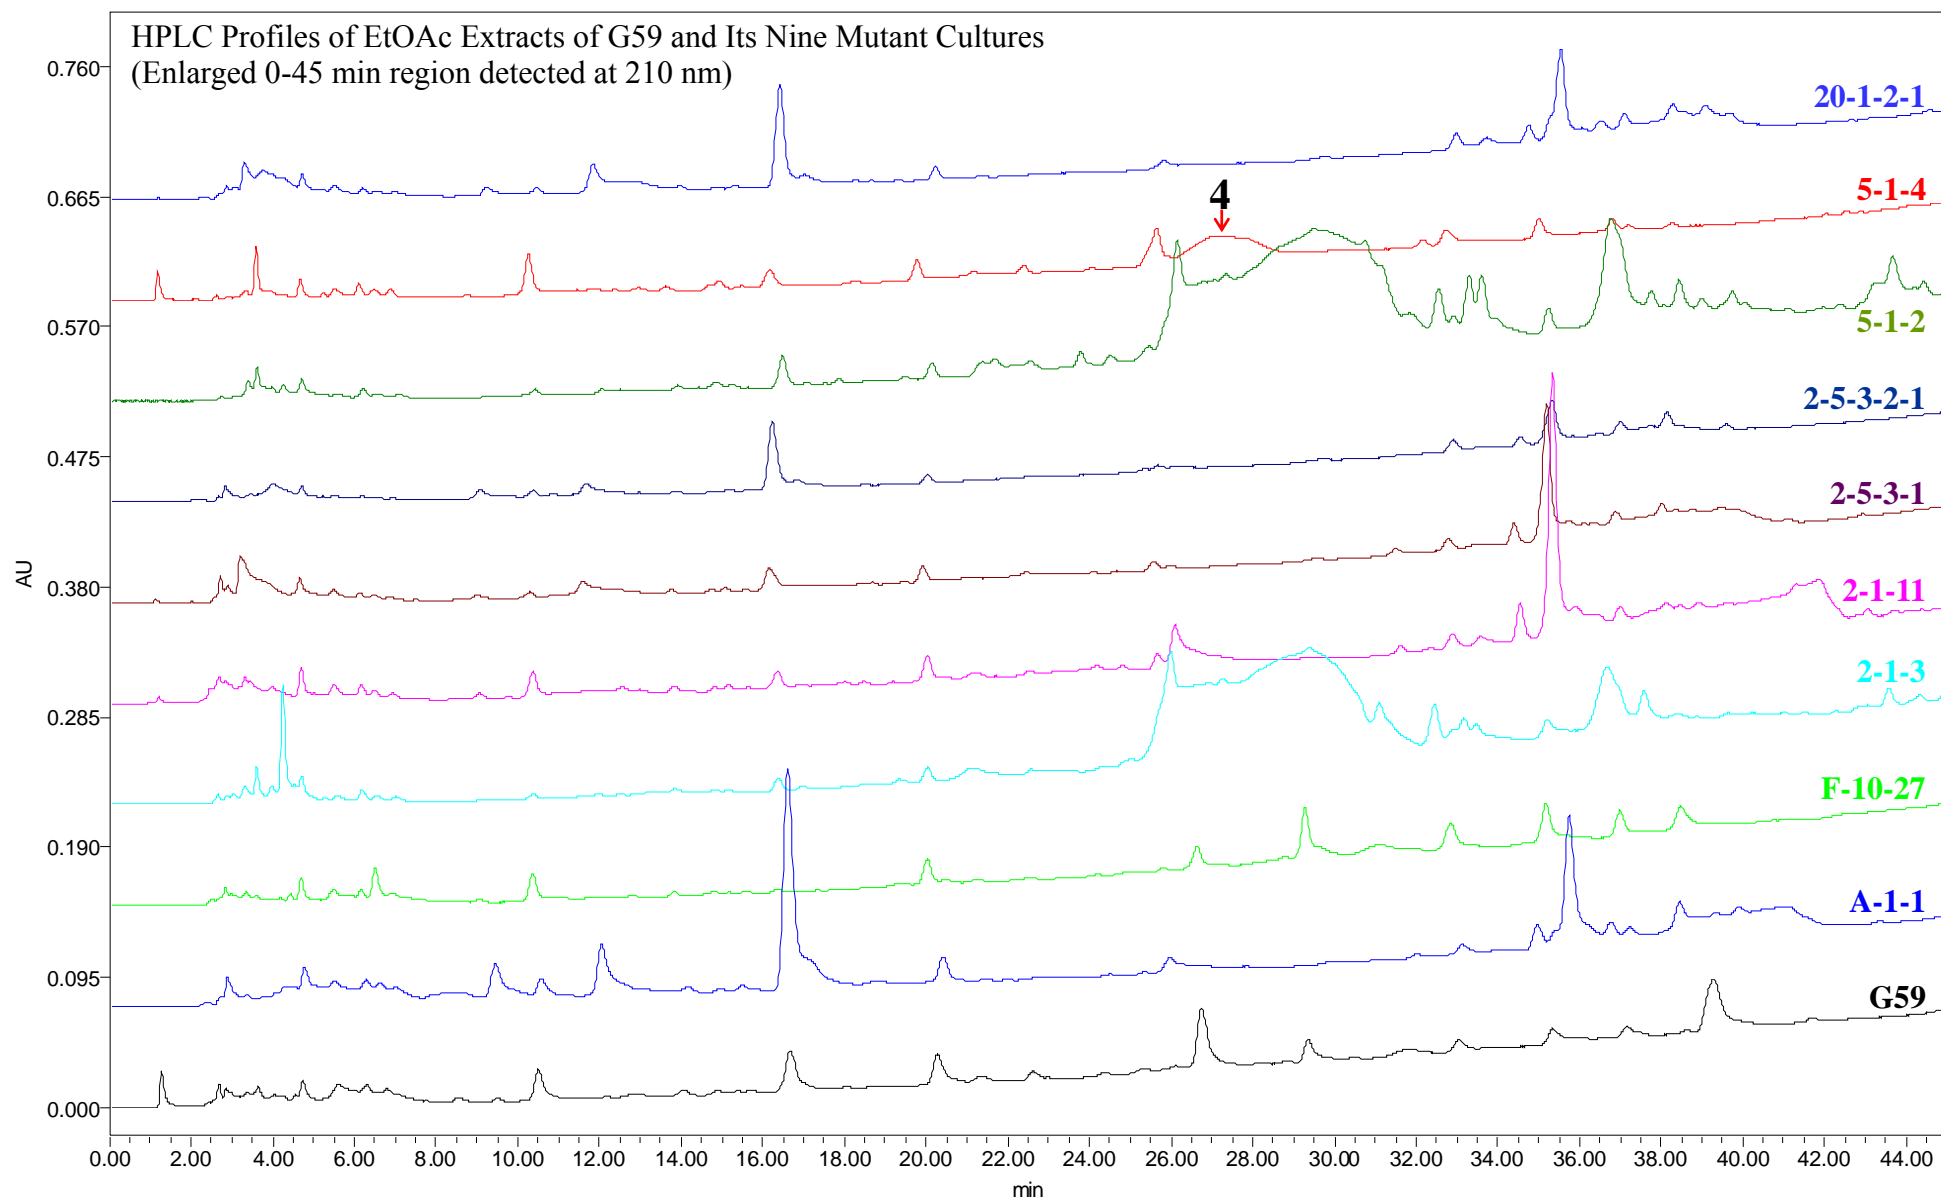

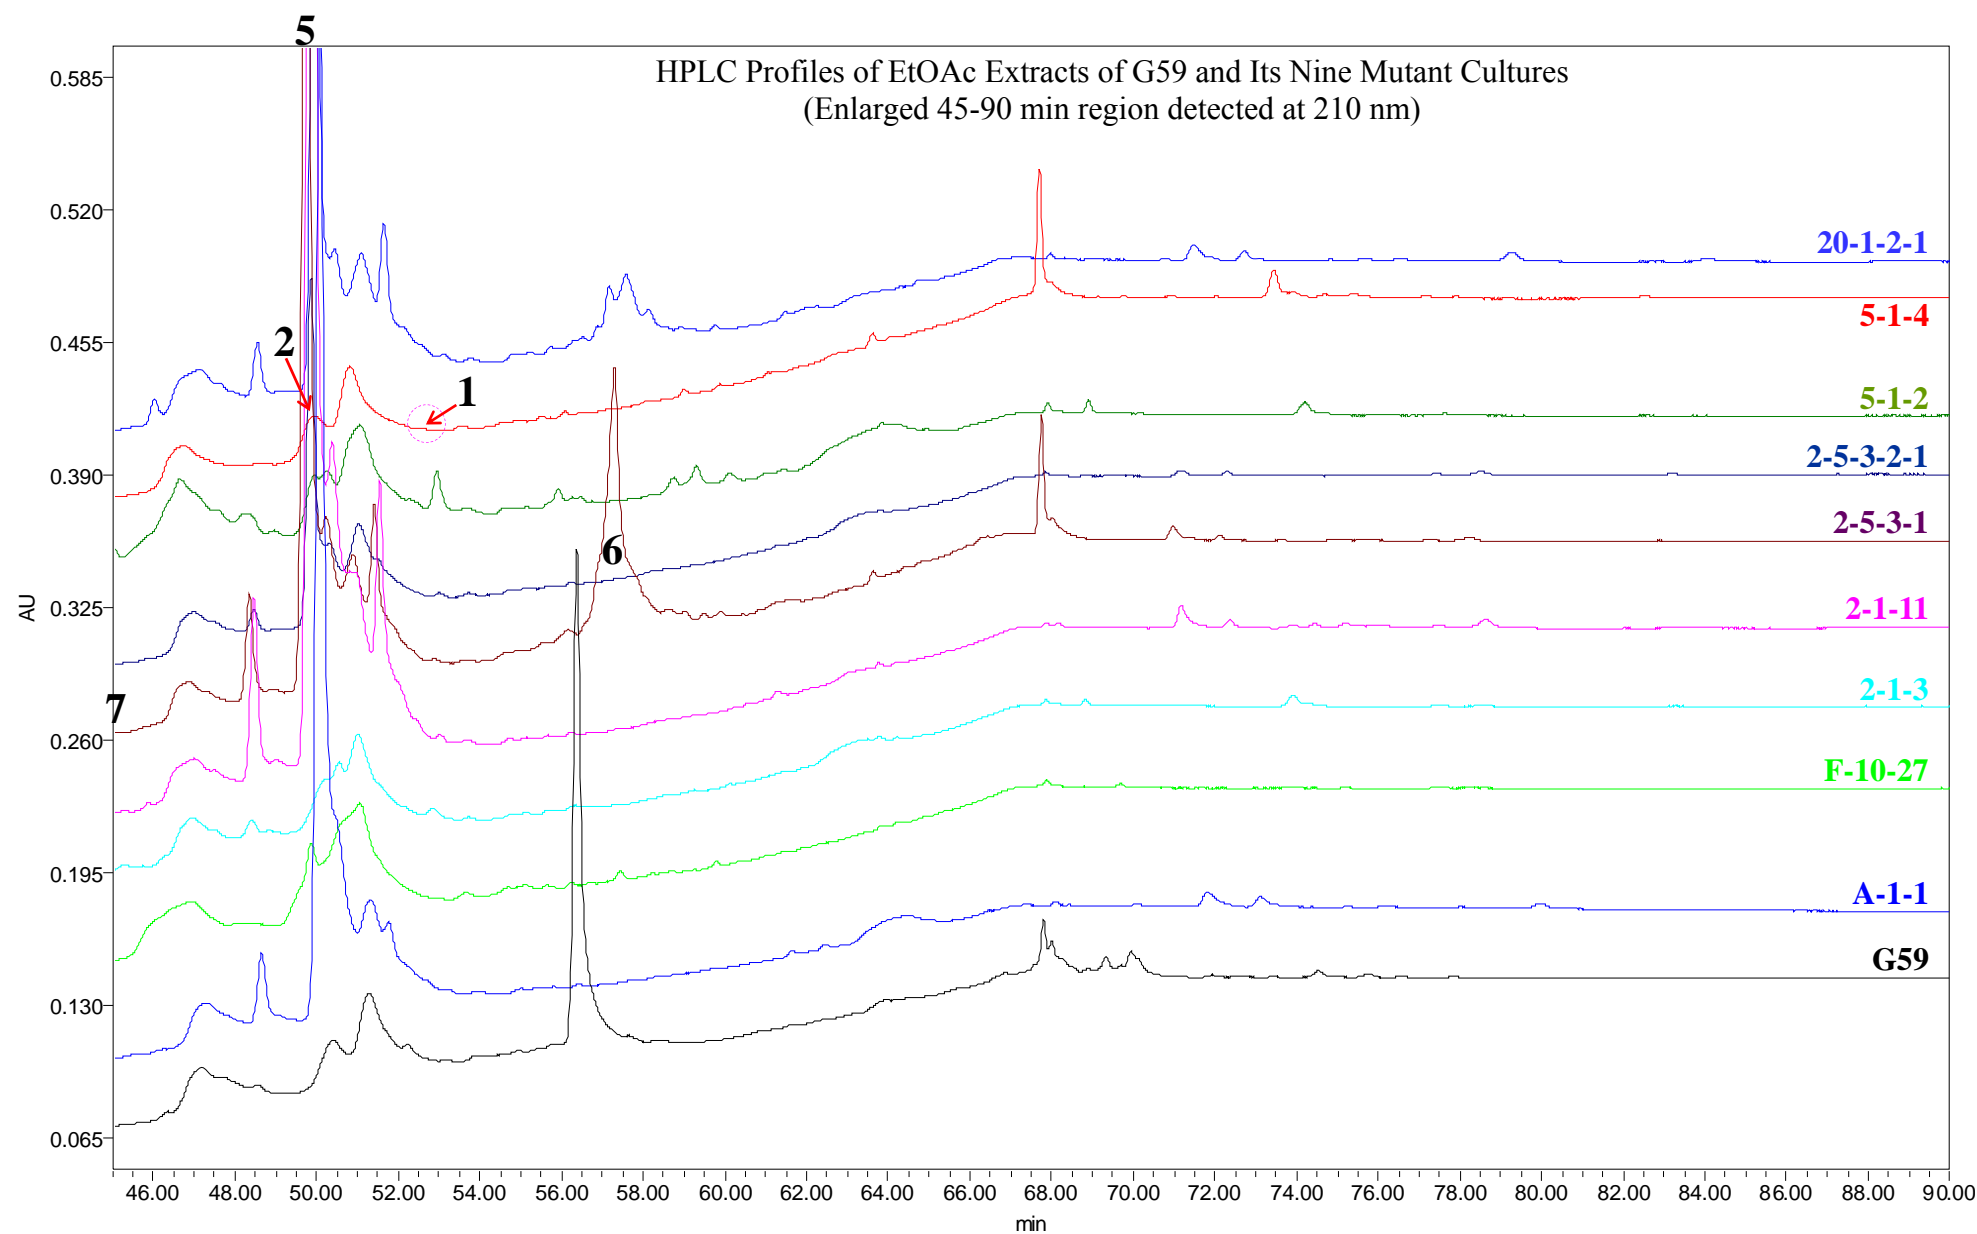

### 1.3. HPLC Profiles Detected at 254 nm

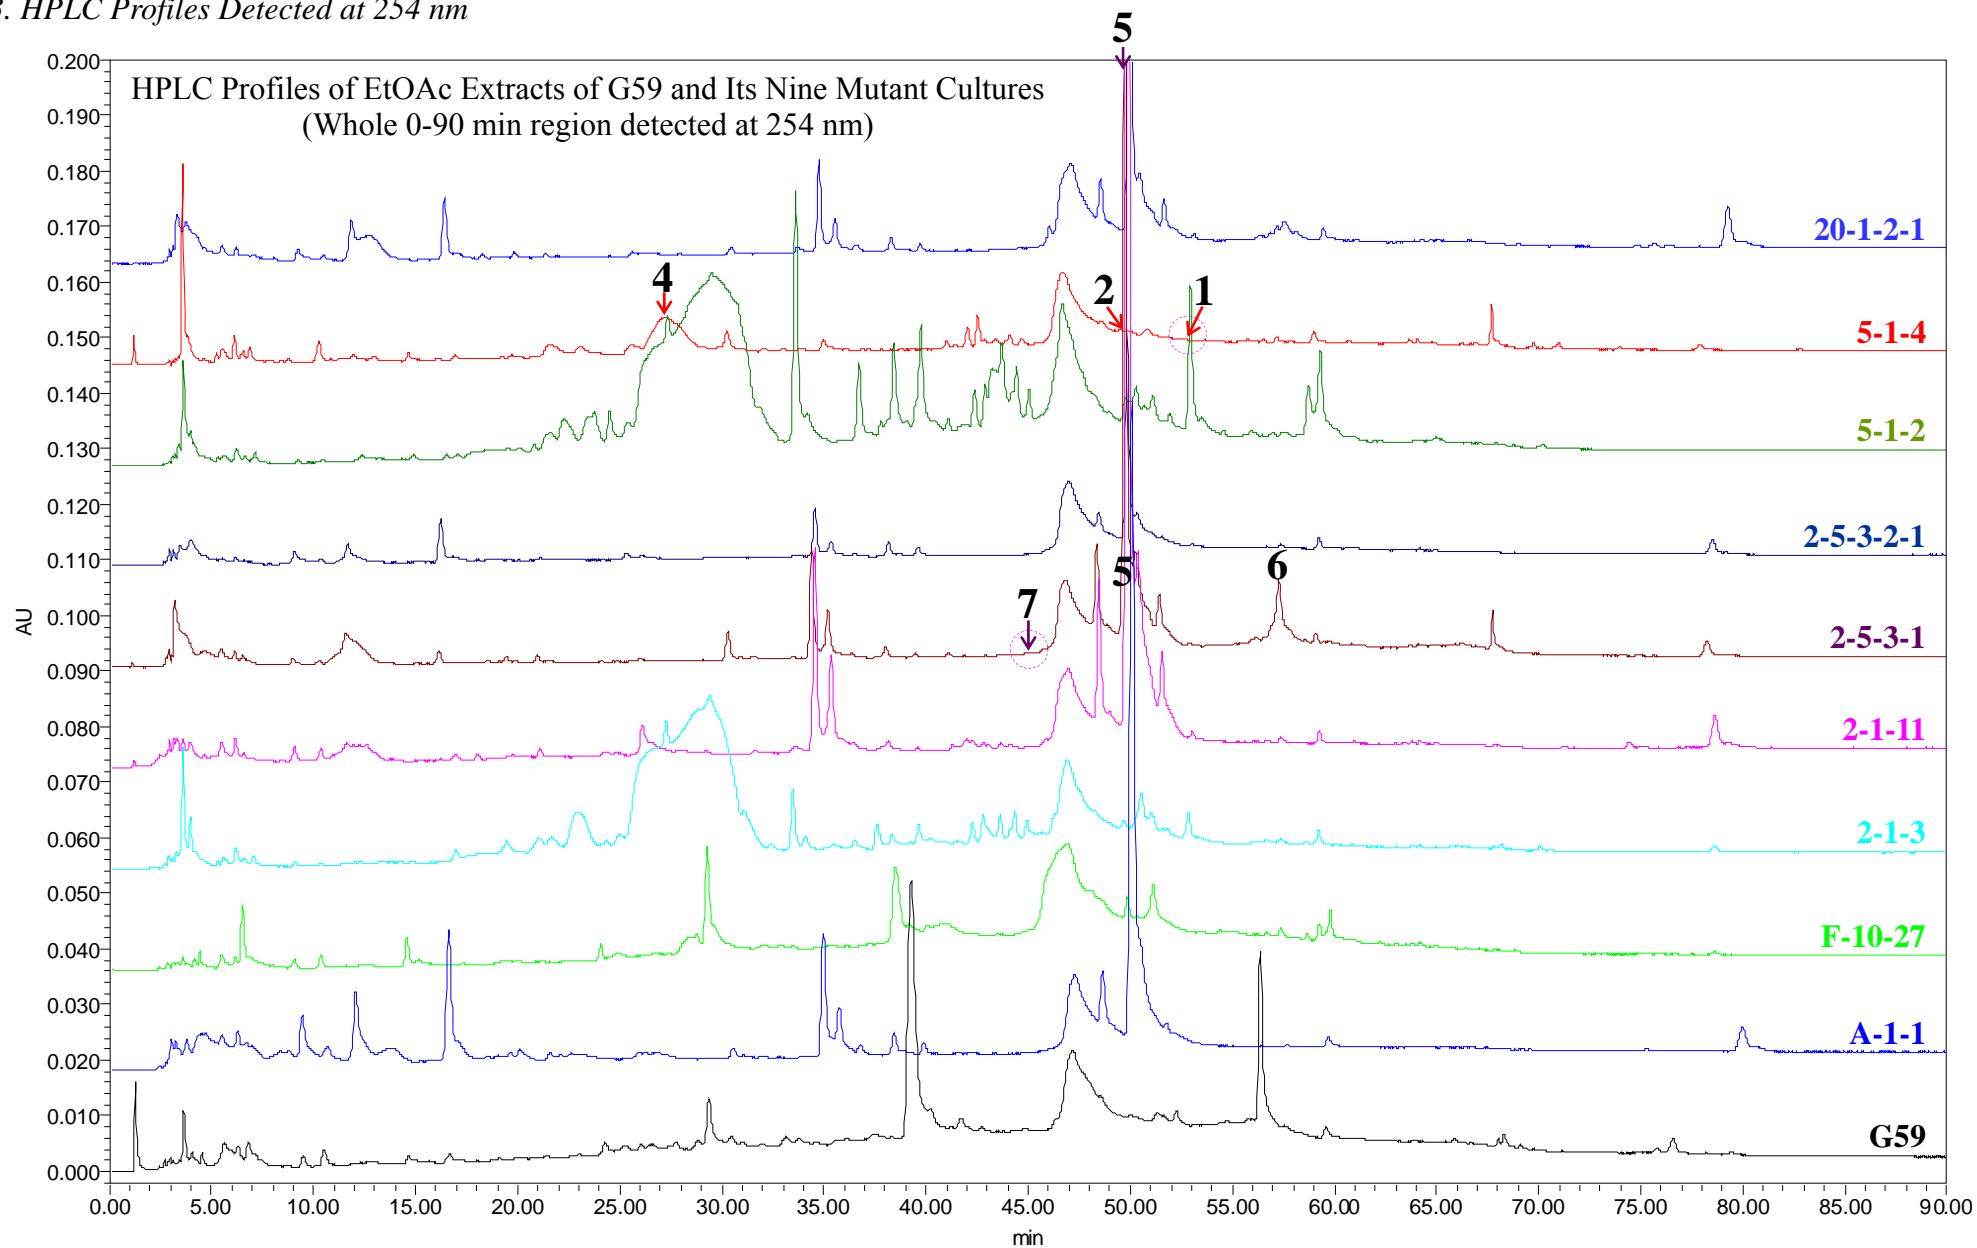

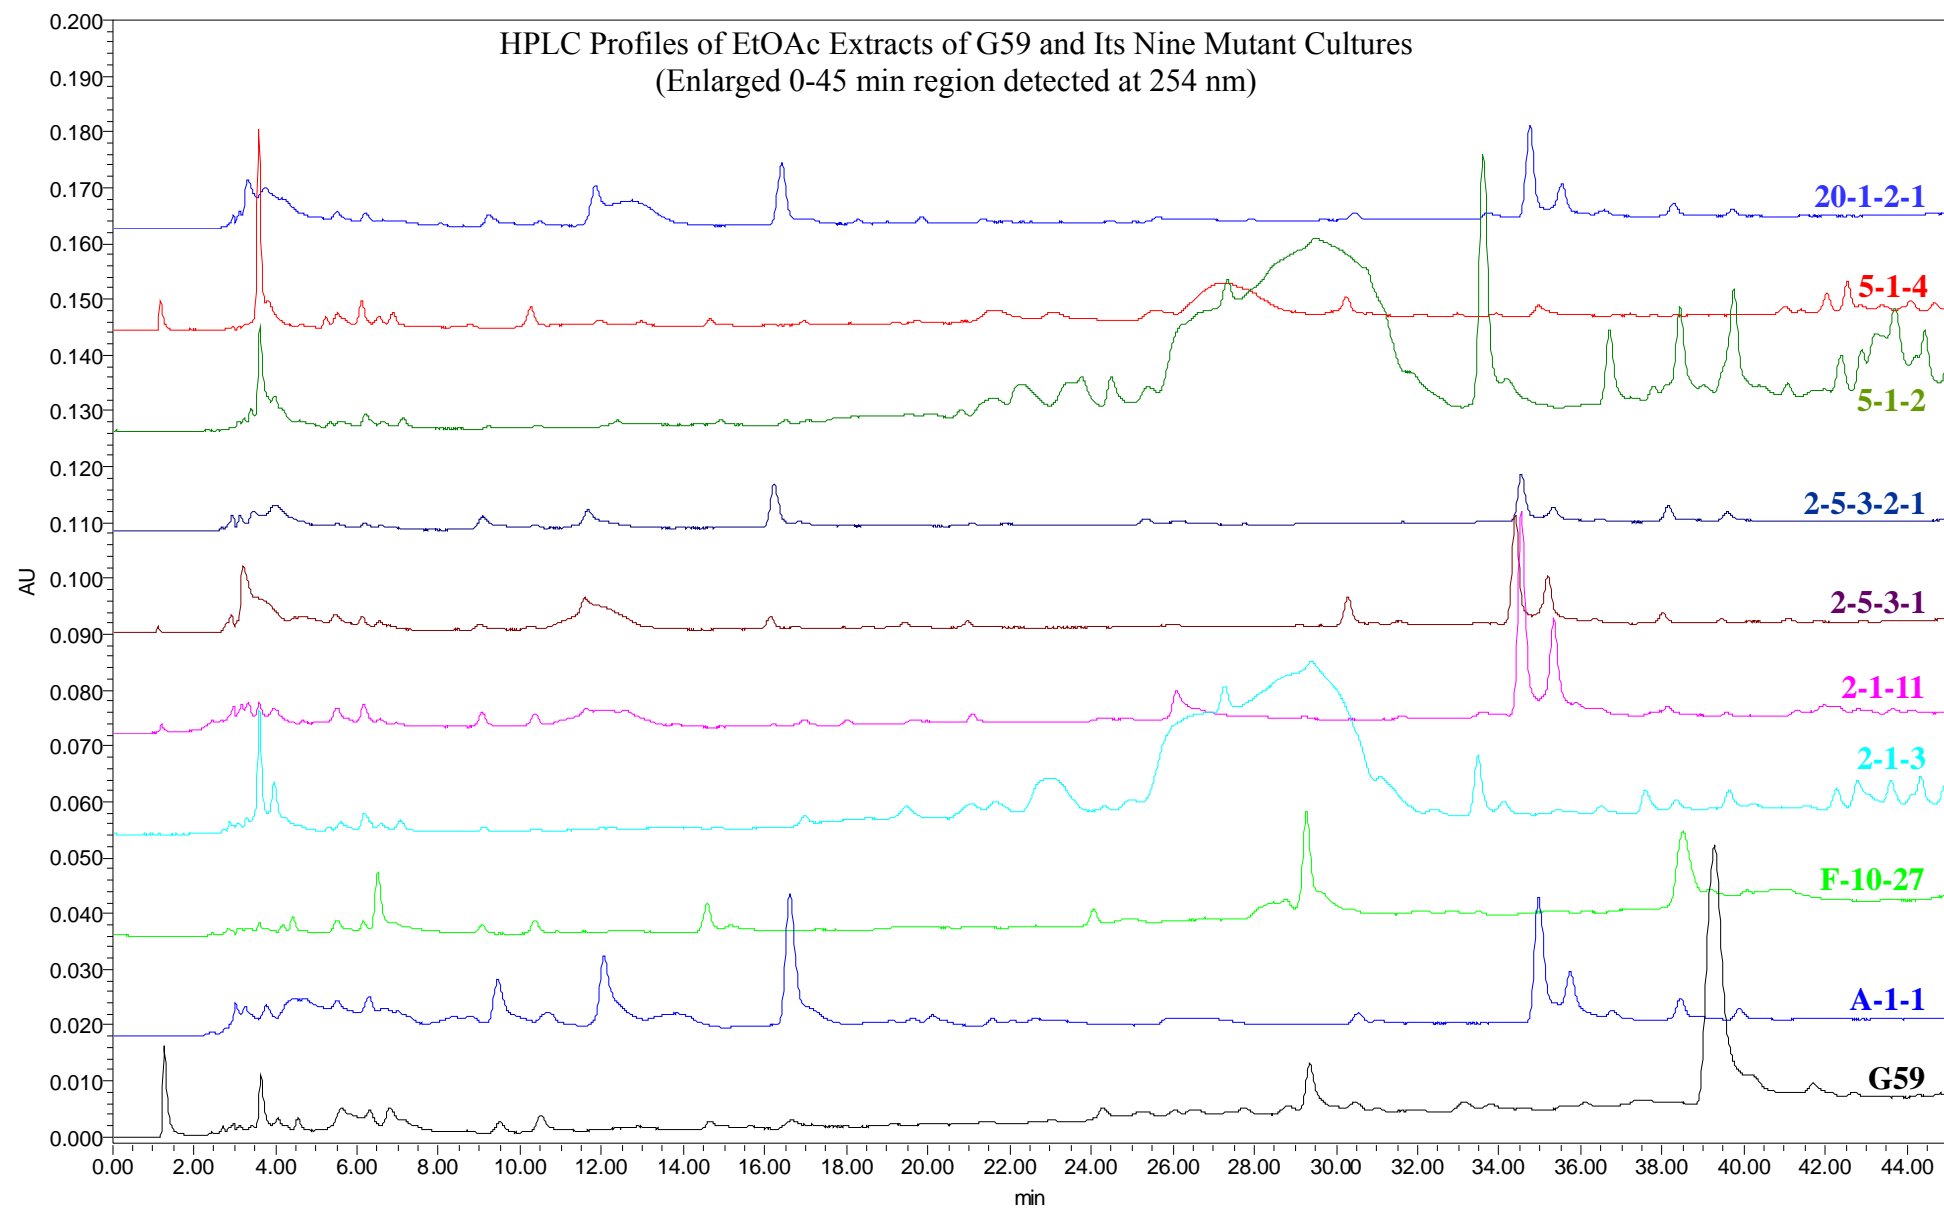

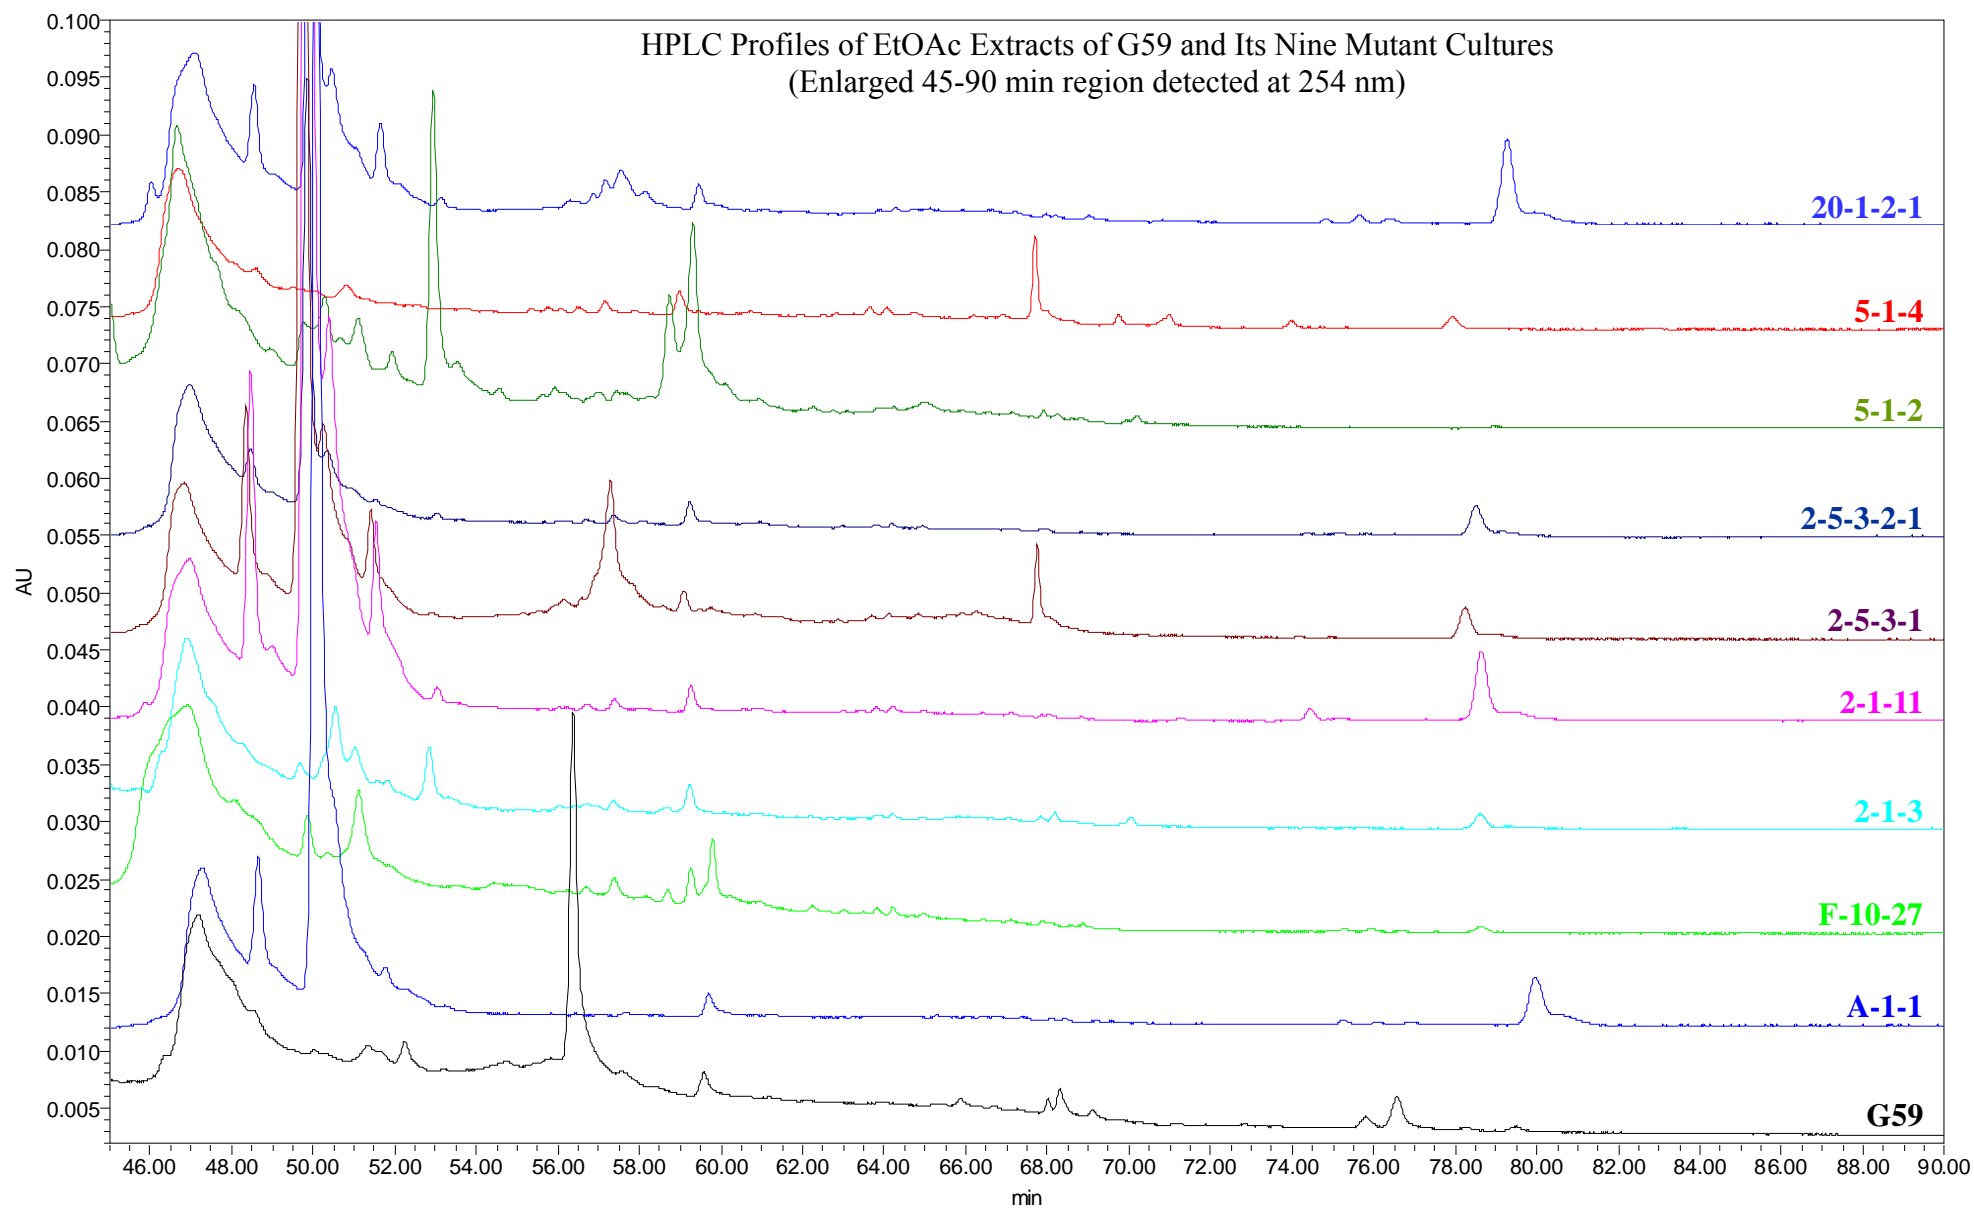

#### 1.4. HPLC Profiles Detected at 290 nm

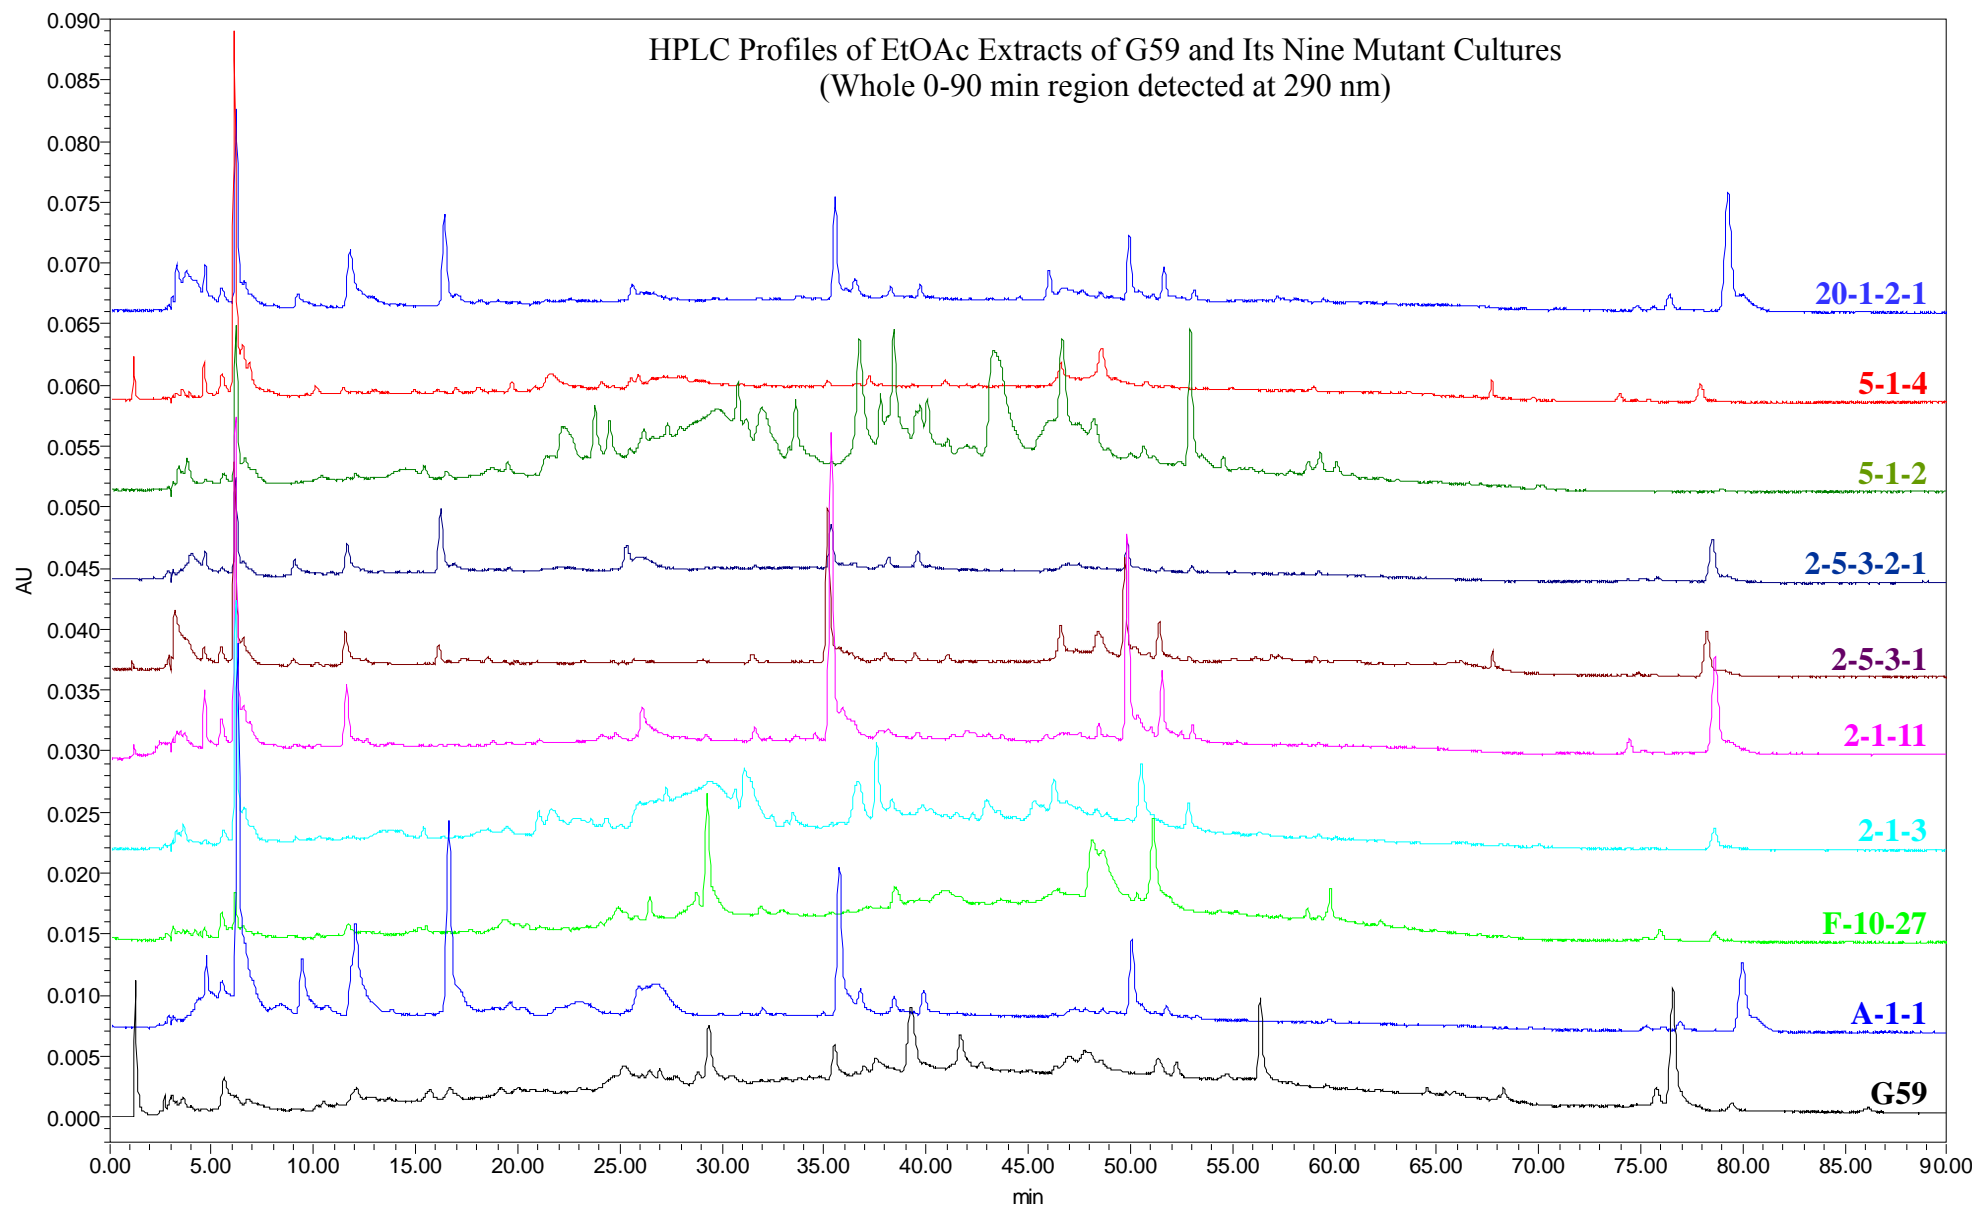



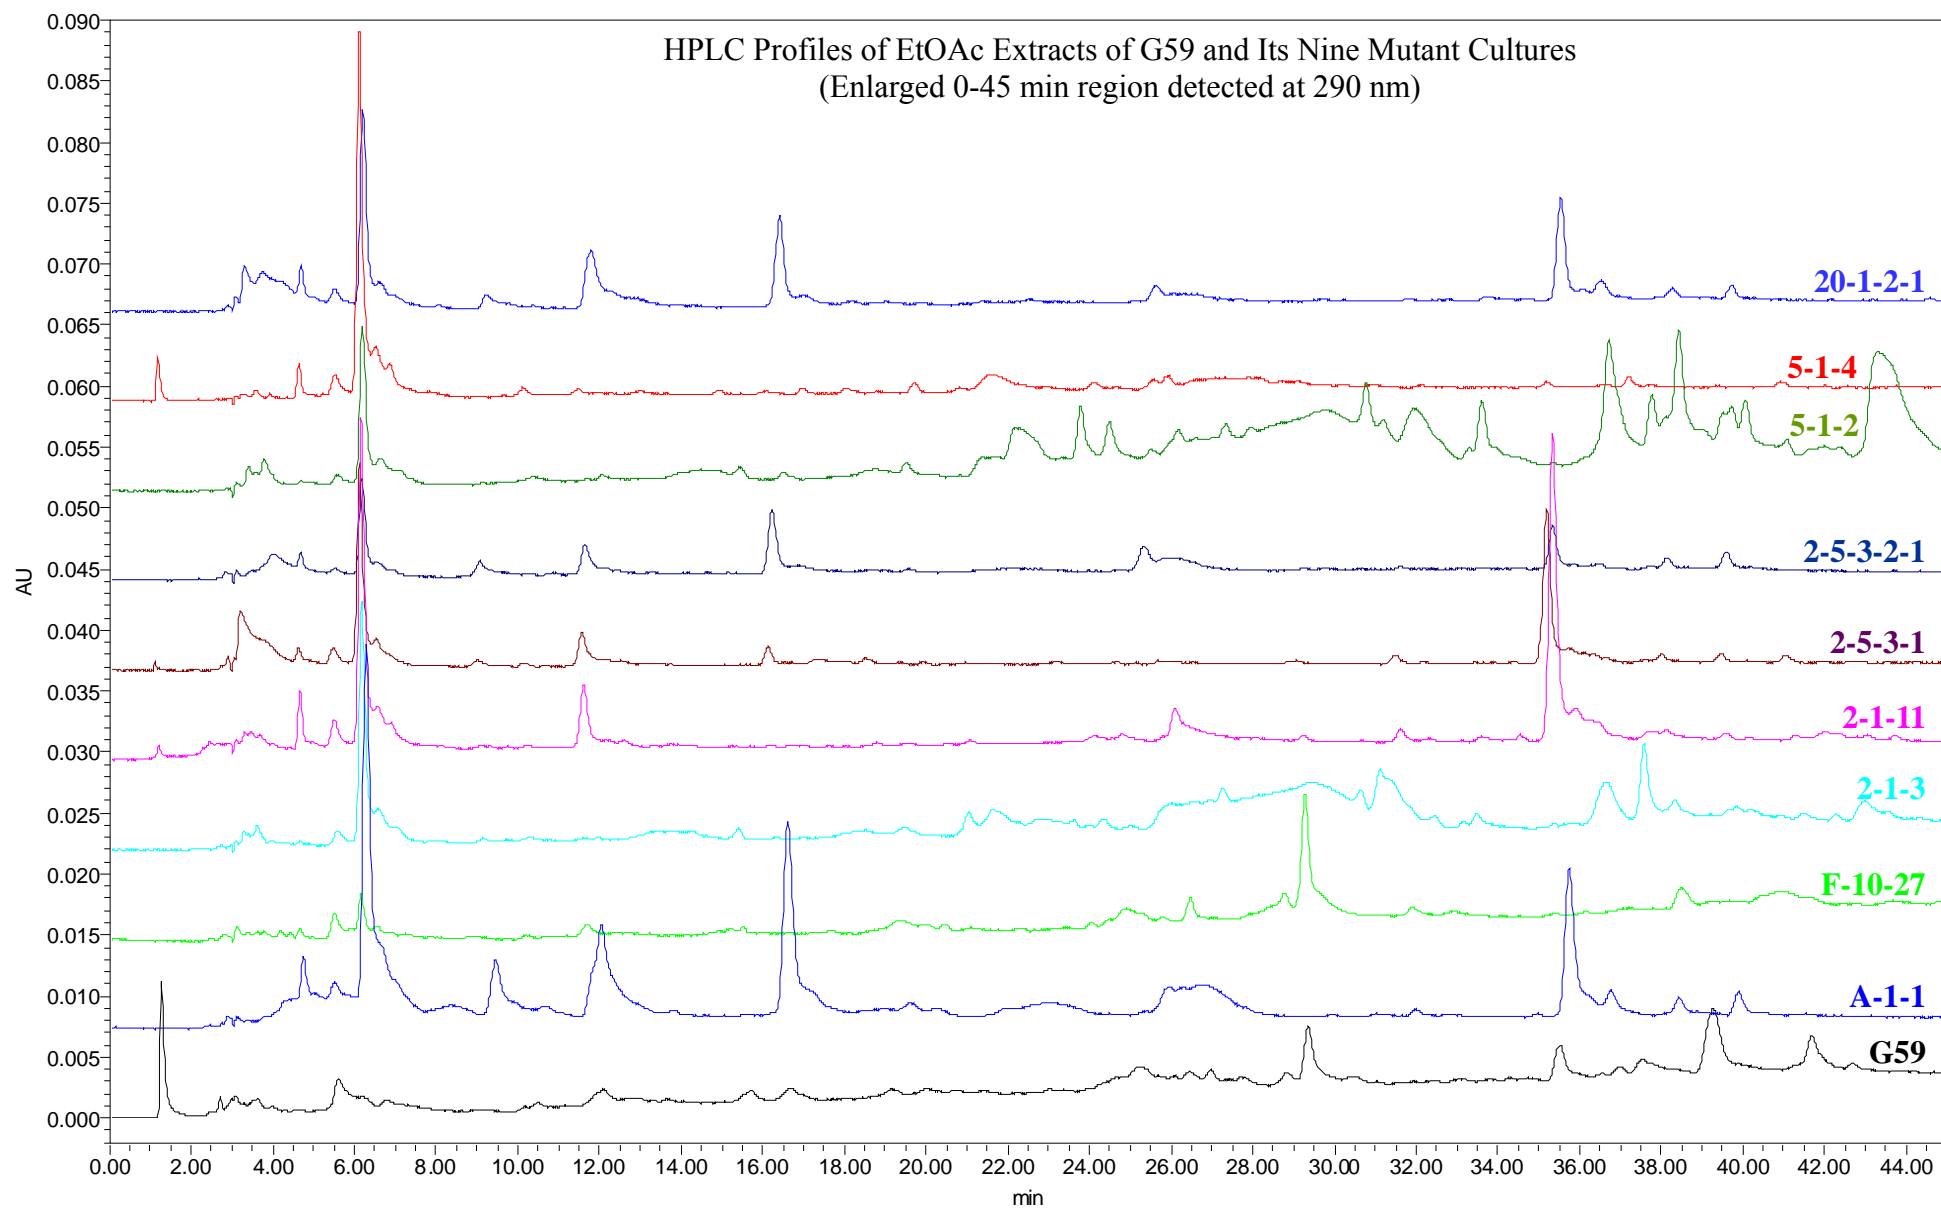

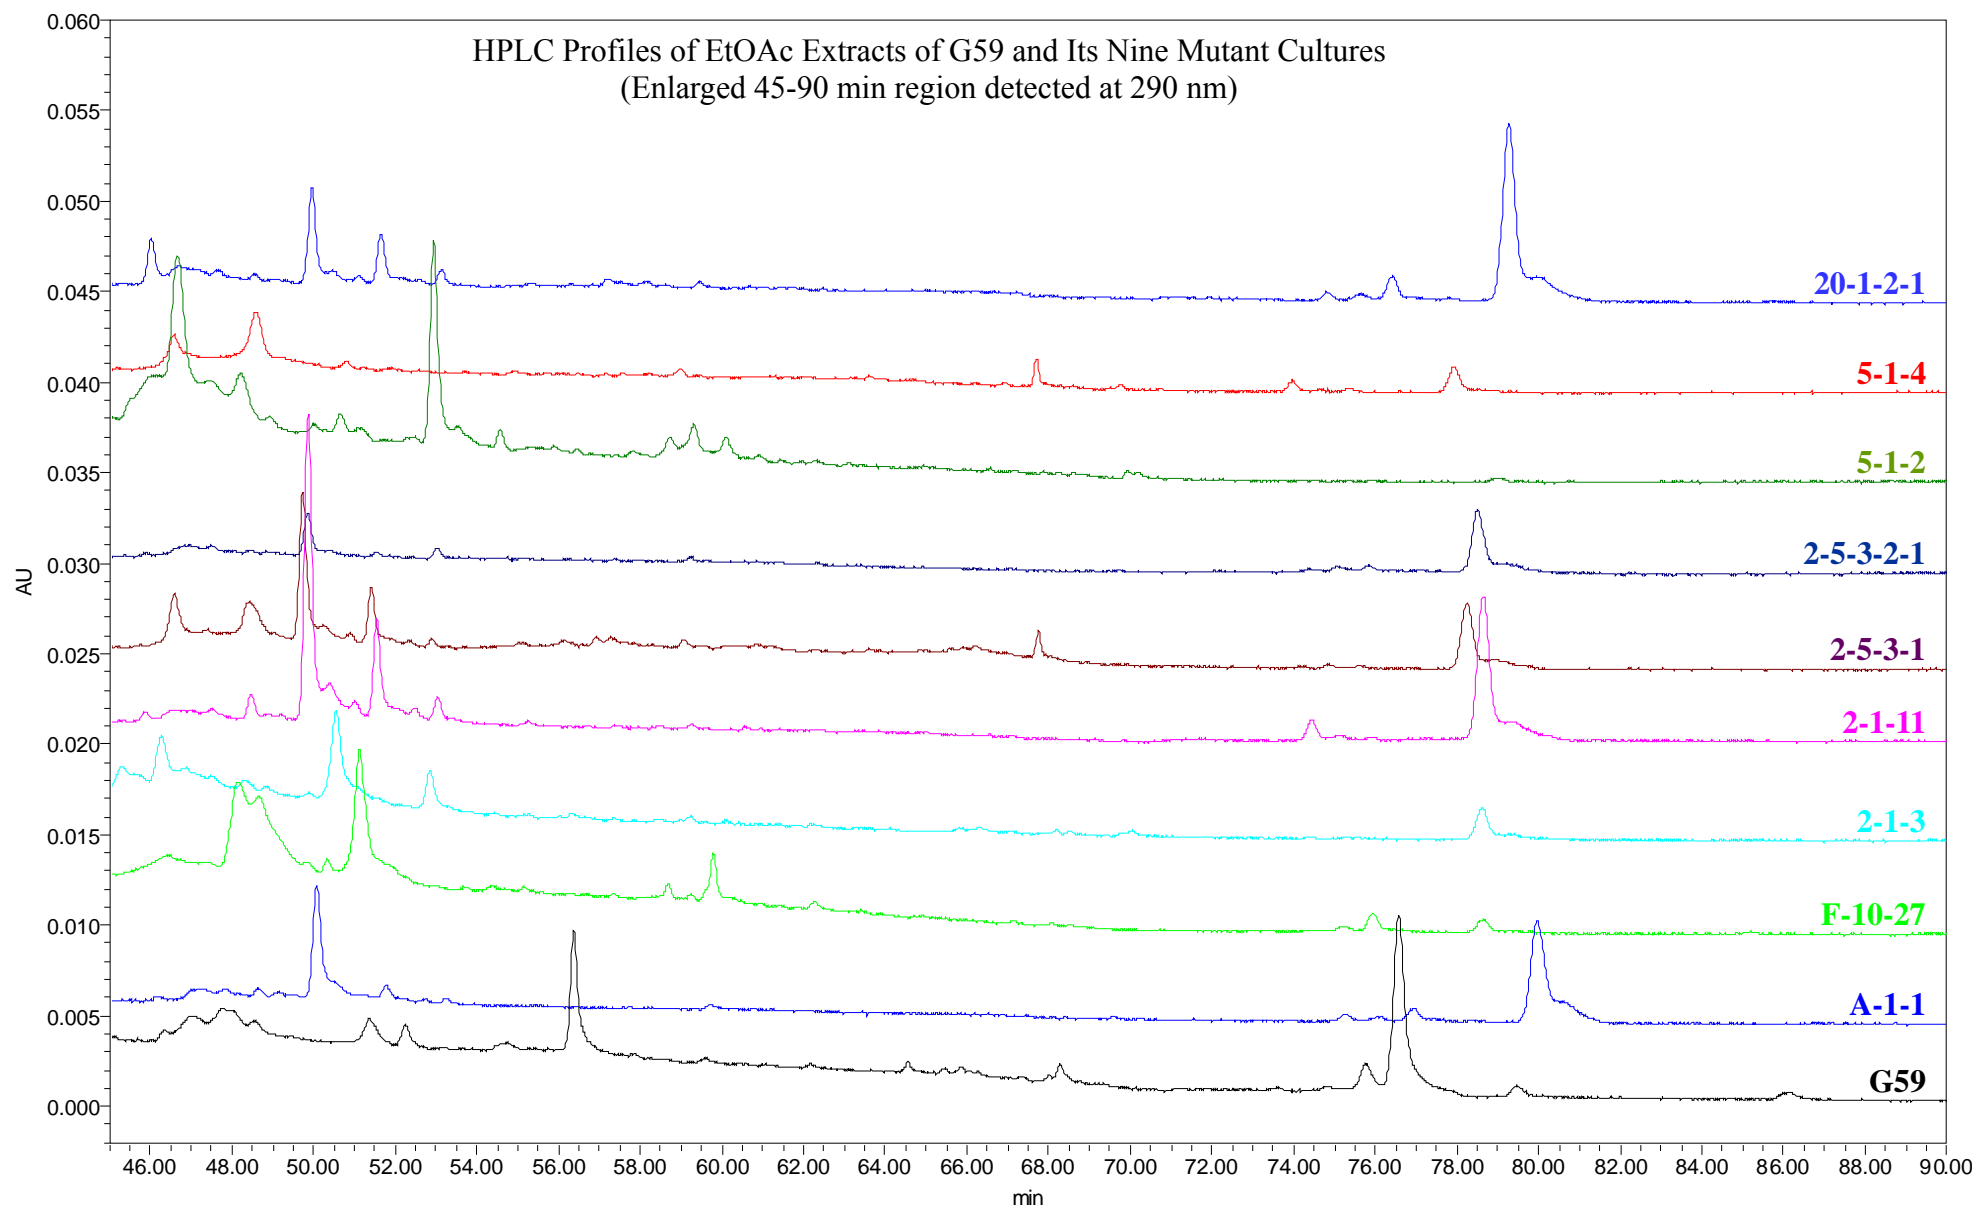

1.5. HPLC Profiles Detected at 350 nm

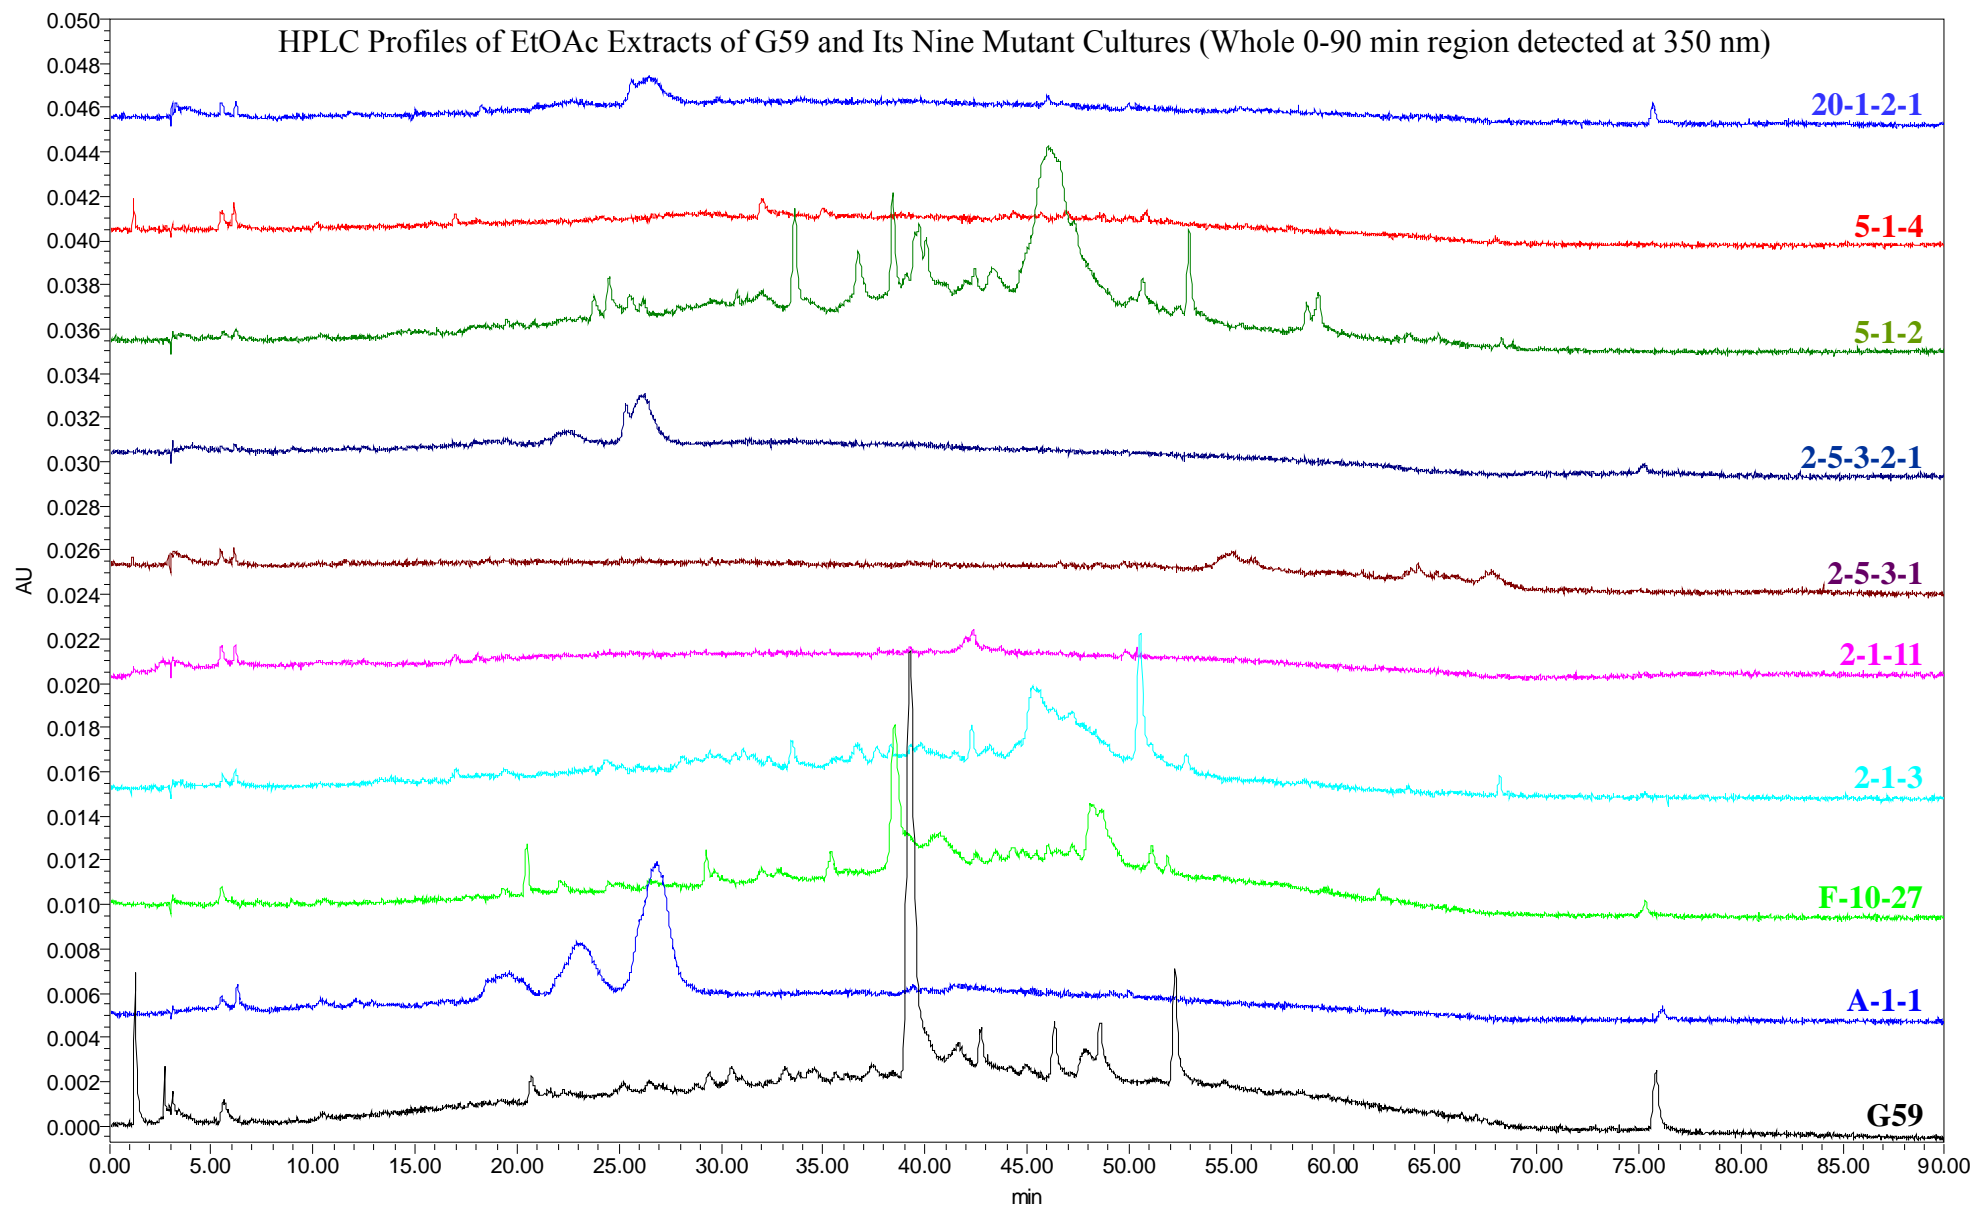

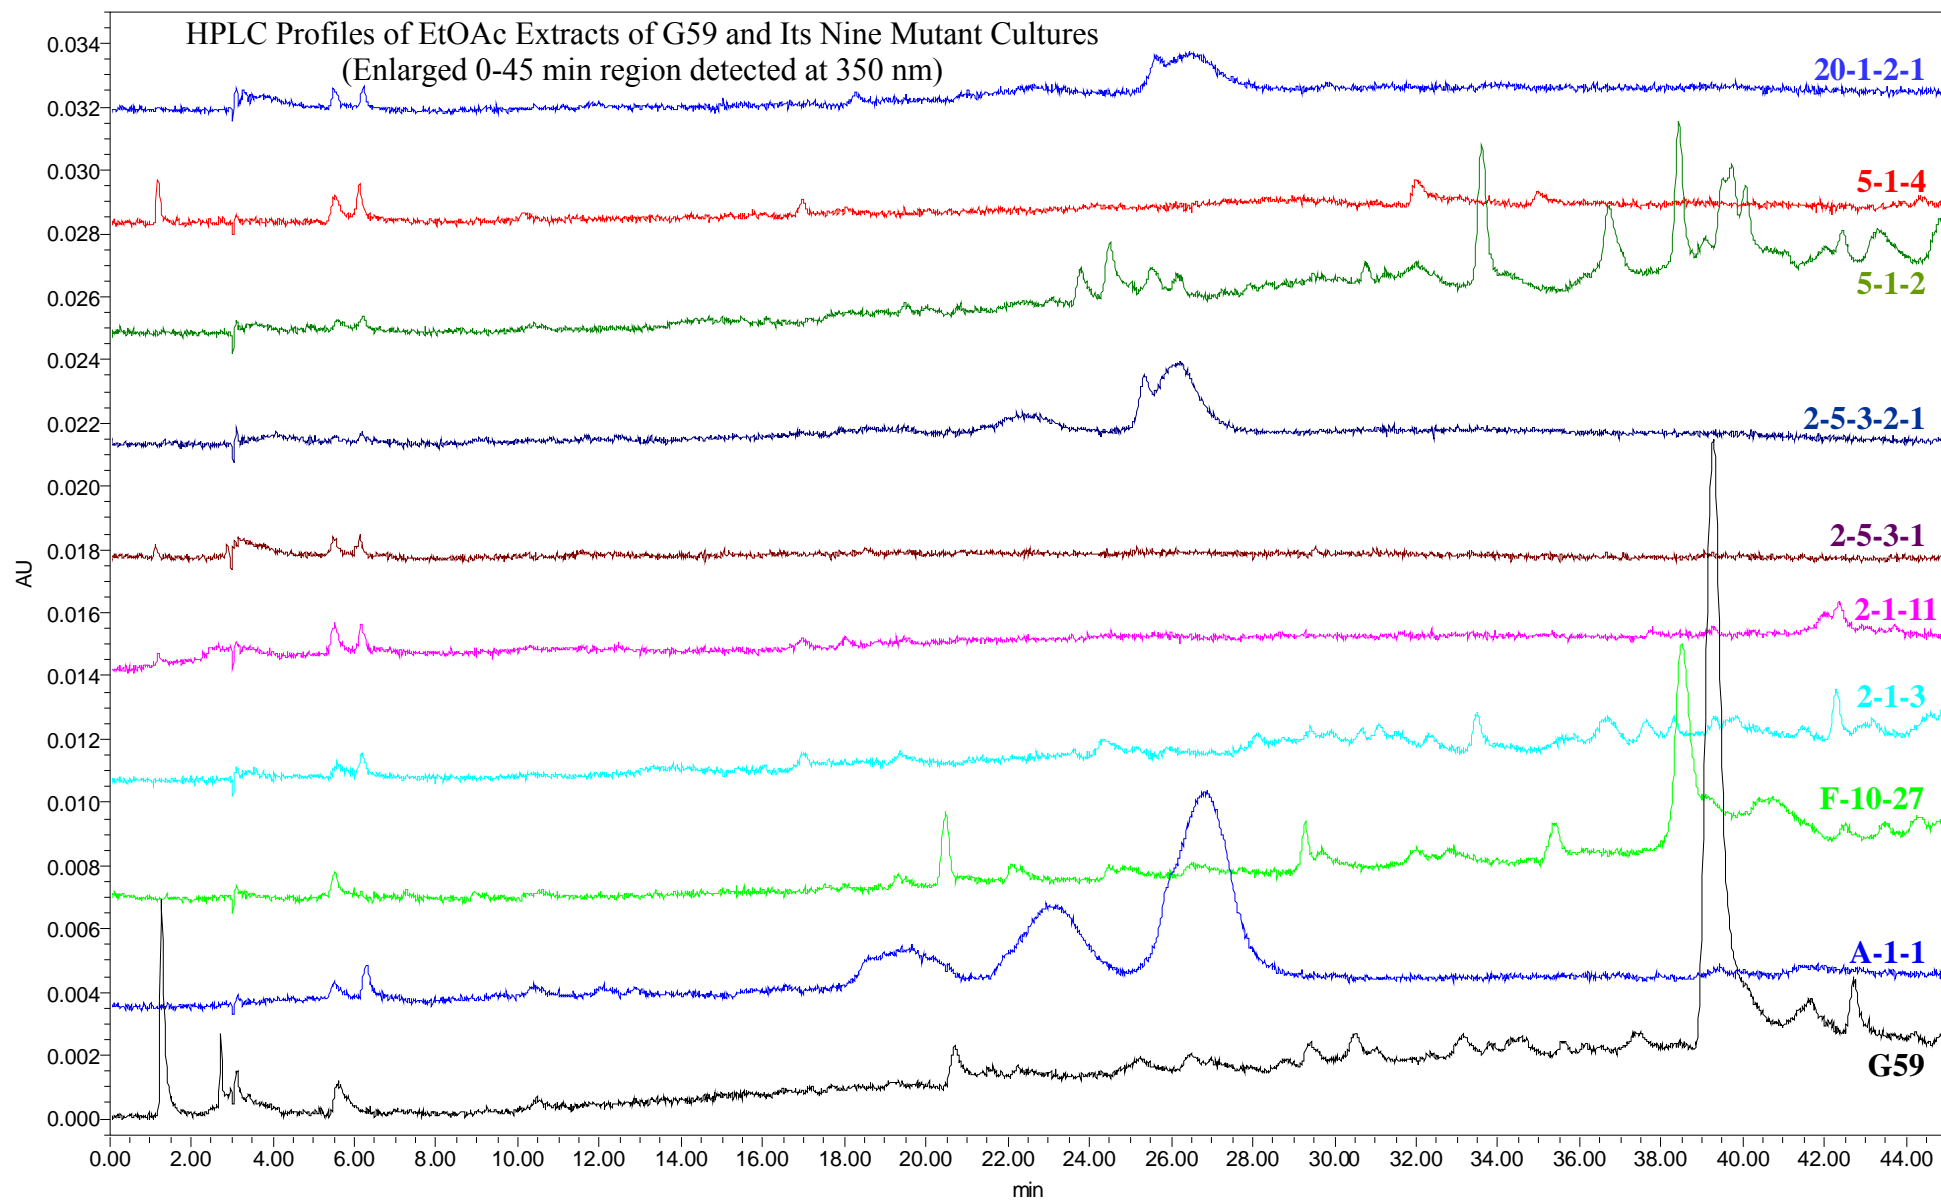

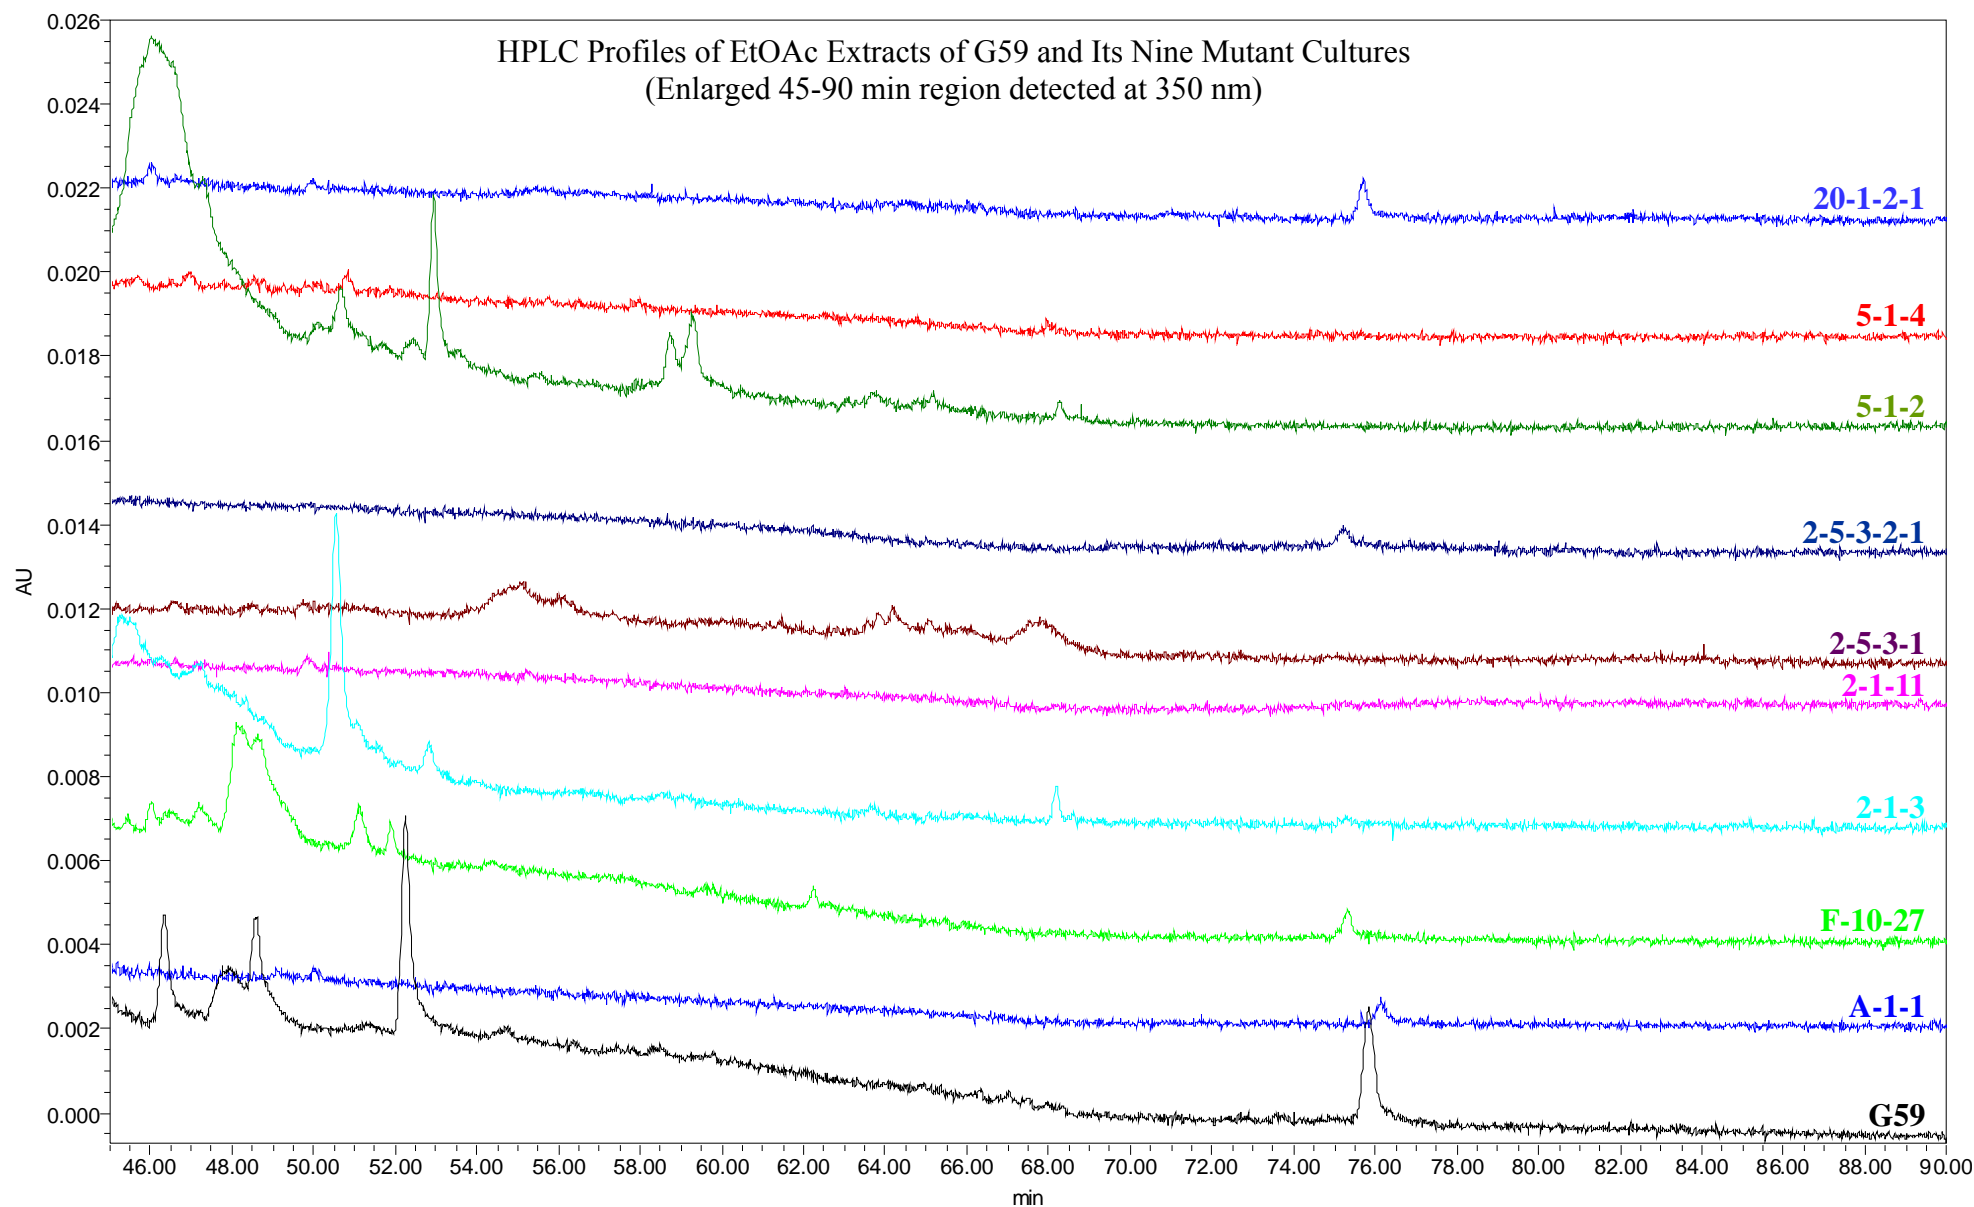

## 2. TLC Chromatograms of EtOAc Extracts of G59 and Its Nine Mutant Cultures

Plate: Silica gel GF<sub>254</sub>. Developing solvent: CHCl<sub>3</sub>–MeOH (9:1). Detection: left, UV 254 nm; middle, UV 365 nm; right, Vaughan's reagent.

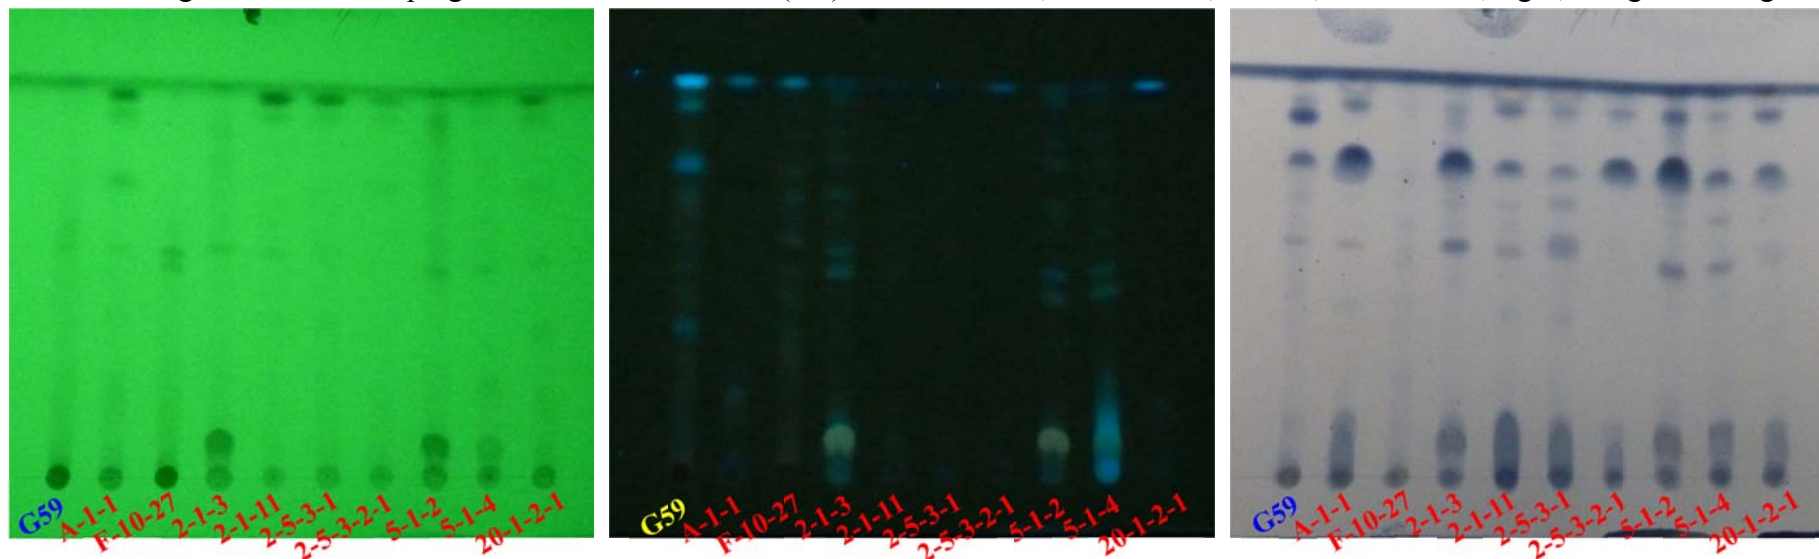

Plate: Silica gel GF<sub>254</sub>. Developing solvent: CHCl<sub>3</sub>–MeOH (15:1). Detection: left, UV 254 nm; middle, UV 365 nm; right, Vaughan's reagent.

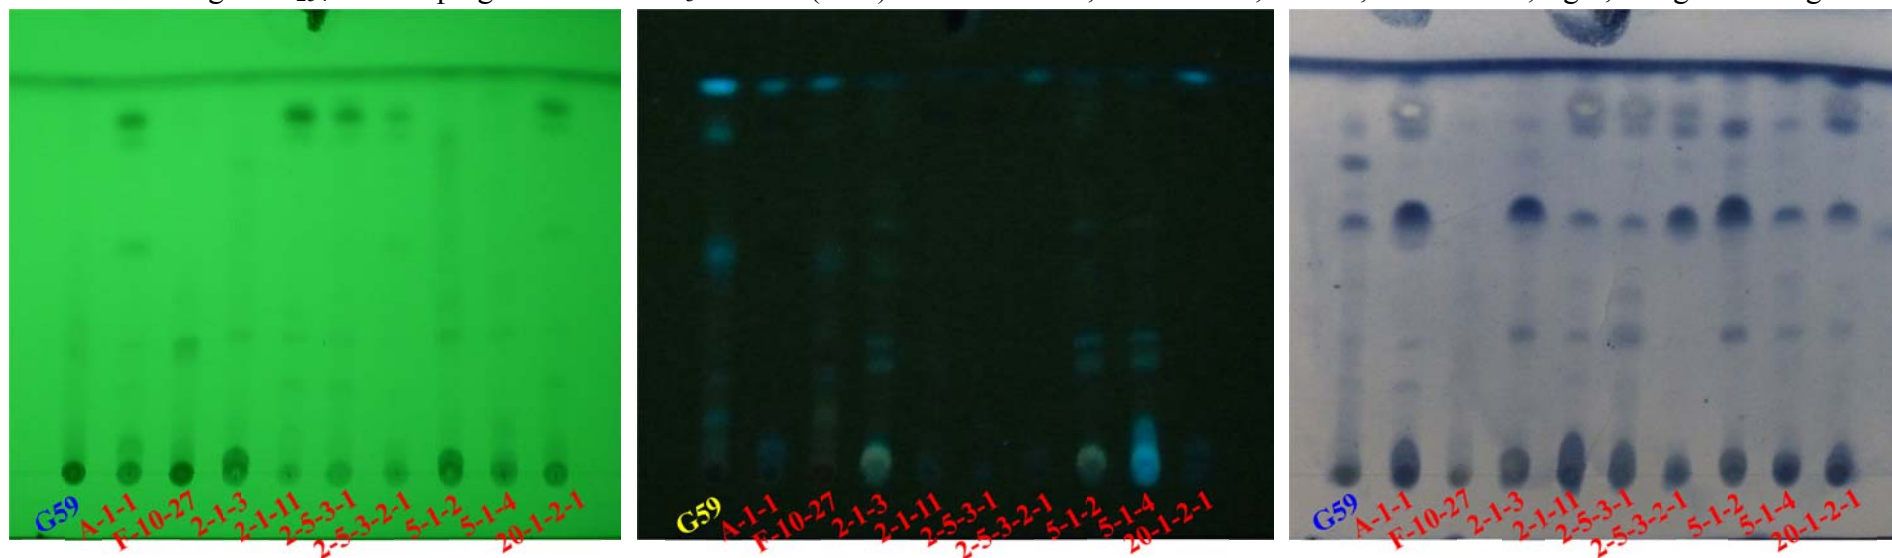

Supplement: s1 [file s1]
