# Supplementary material for: Activation of the Dormant Secondary Metabolite Production by Introducing Gentamicin-Resistance in a Marine-Derived Penicillium purpurogenum G59
Source: MDPI journal article supplement (doi:10.3390/md10030559), 2012-03-02

# Activation of the dormant secondary metabolite production by introducing gentamicin-resistance in a marine-derived *Penicillium purpurogenum* G59

Yun-Jing Chai, Cheng-Bin Cui \*, Chang-Wei Li, Chang-Jing Wu, Cong-Kui Tian and Wei Hua

Prof. Dr. C.-B. Cui, Beijing Institute of Pharmacology and Toxicology, 27 Tai-Ping Road, Haidian District, Beijing 100850, China. E-mail: cuicb@sohu.com, cuicb@126.com; Tel./Fax.: +86-10-6821- 1656.

## Supplementary Data S2 – TLC and HPLC Analysis for Compounds 1-7

### Contents of Supplementary Data S2

1. TLC analysis for compounds 1–4 and for 2 and 5 .....page S2-1
2. HPLC analysis for compounds 1, 2 and 4–7 ..... page S2-1
  - 2.1. HPLC analysis for 1 by comparison with G59 extract .....page S2-2
  - 2.2. HPLC analysis for 2 by comparison with G59 extract .....page S2-3
  - 2.3. HPLC analysis for 4 by comparison with G59 extract .....page S2-5
  - 2.4. HPLC analysis for 5 by comparison with G59 extract .....page S2-7
  - 2.5. HPLC analysis for 6 by comparison with G59 extract .....page S2-9
  - 2.6. HPLC analysis for 7 by comparison with G59 extract .....page S2-11

### 1. TLC analysis for compounds 1–4 and for 2 and 5

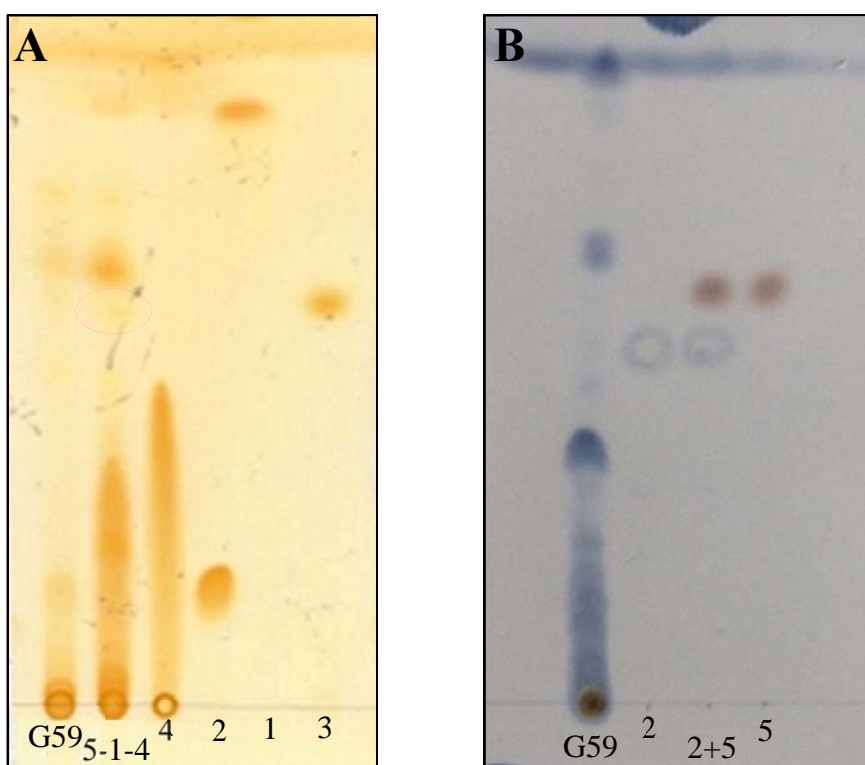

Silica Gel GF254 Plate TLC Chromatograms for Compounds 1–5

Developing solvent: A, CH<sub>2</sub>Cl<sub>2</sub>–Acetone 5:1; B, CHCl<sub>3</sub>–MeOH 30:1

Detecting reagent: A, I (iodine); B, Vaughan's reagent

### 2. HPLC analysis for compounds 1, 2 and 4–7

## 2.1 HPLC analysis for compound **1** by comparison with the EtOAc extract of G59 culture

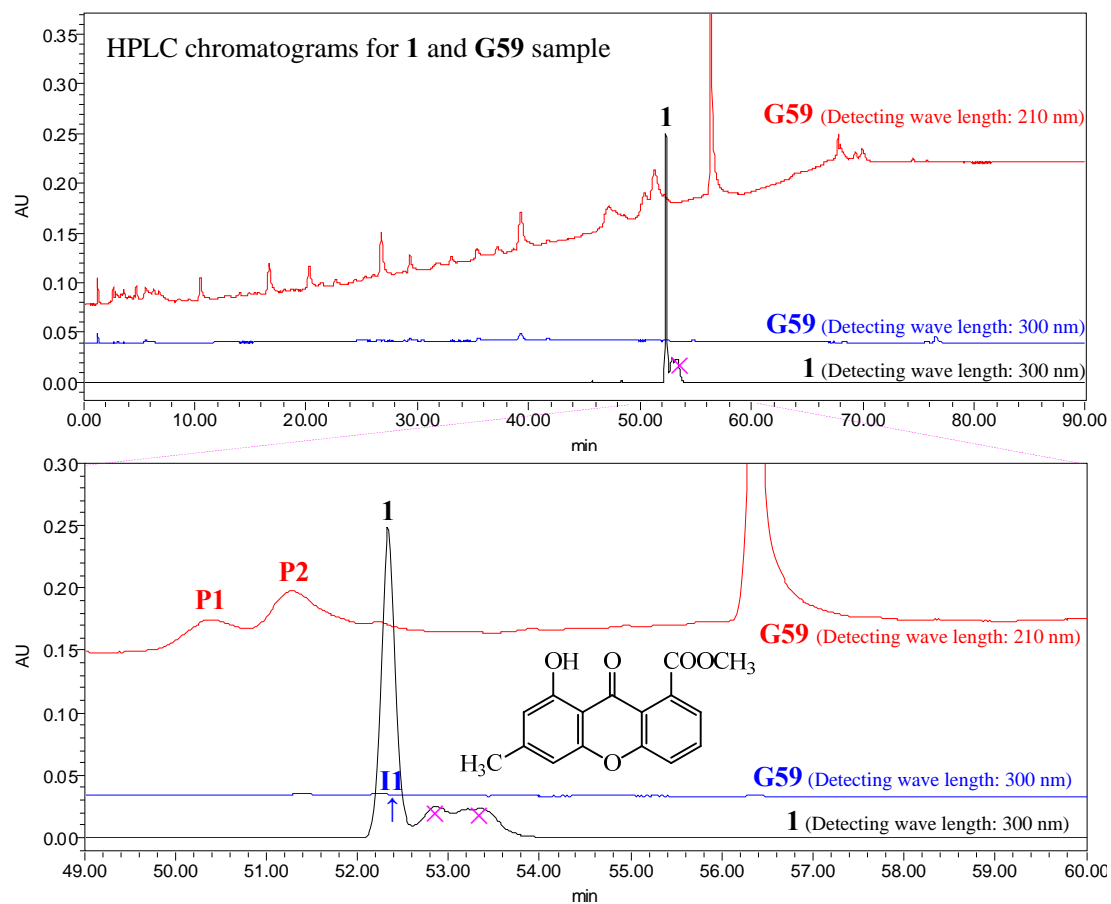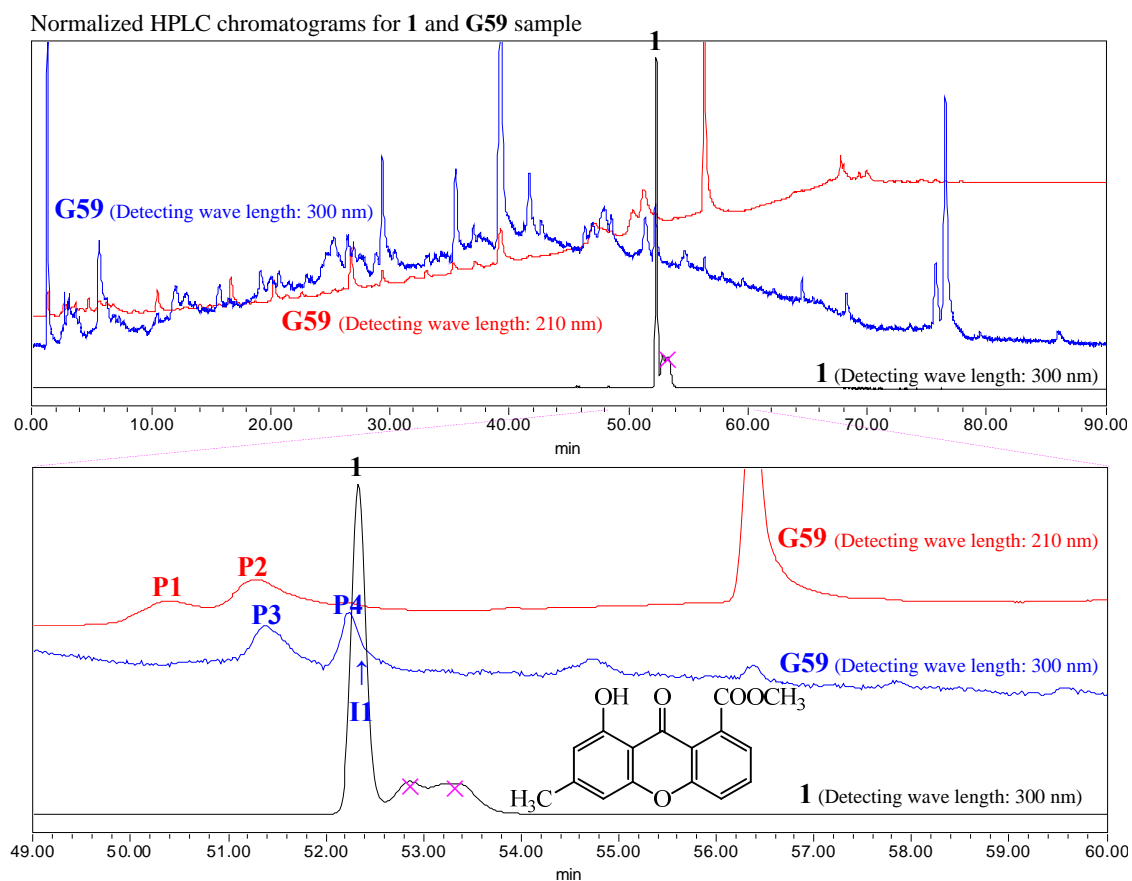

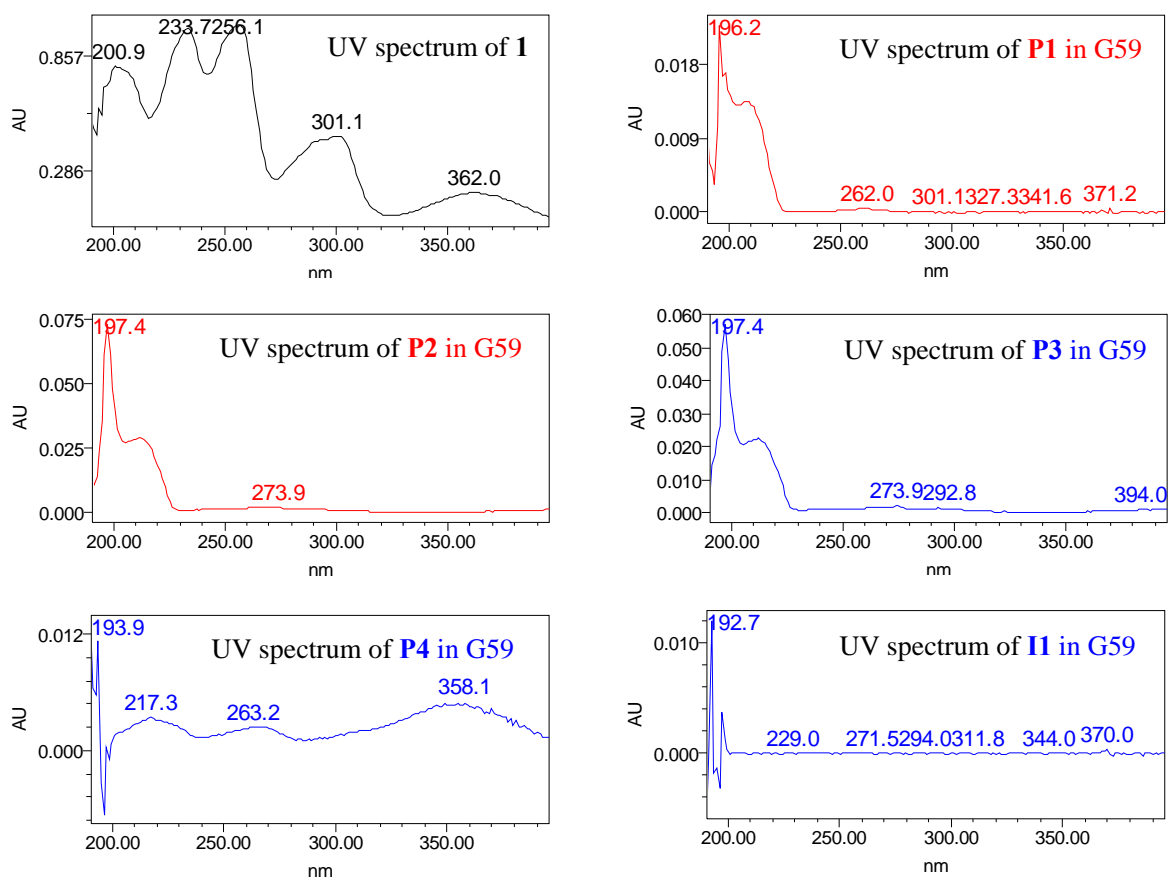

## 2.2 HPLC analysis for compound **2** by comparison with the EtOAc extract of G59 culture

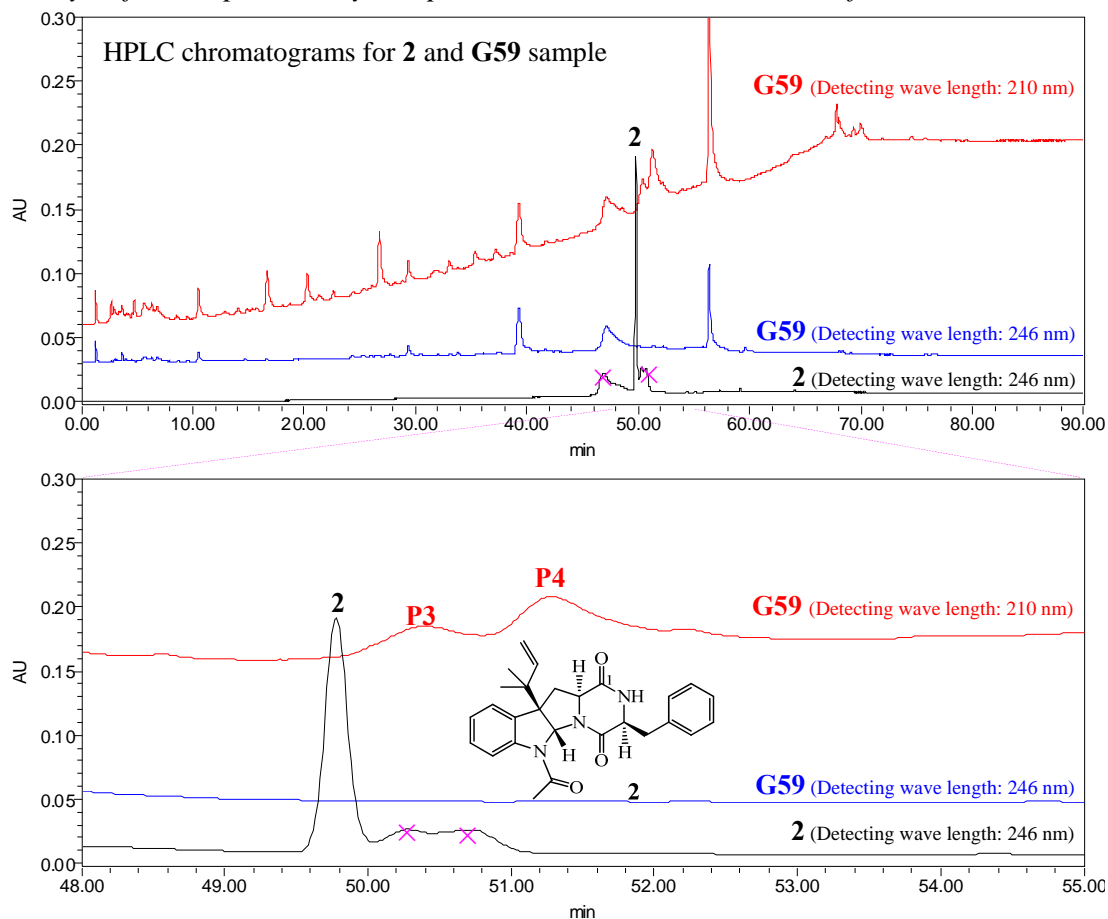

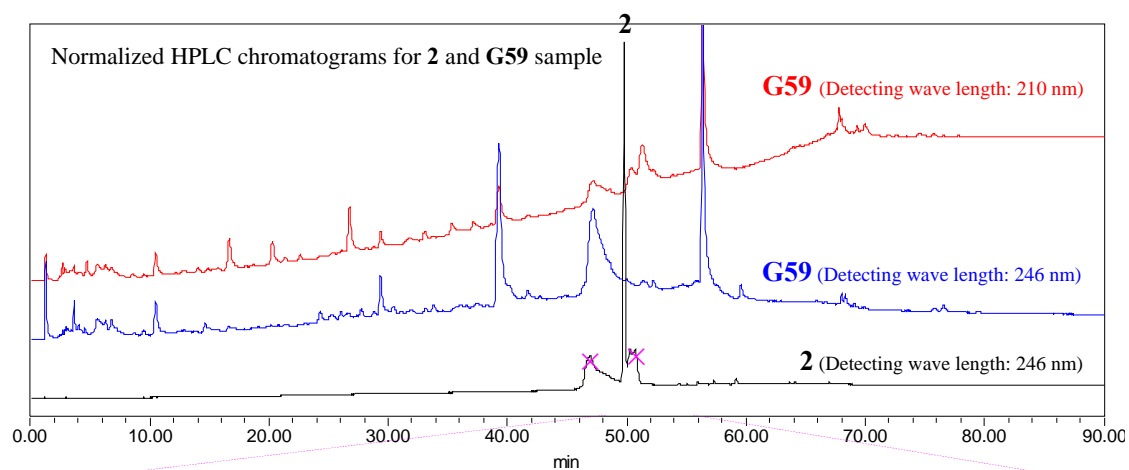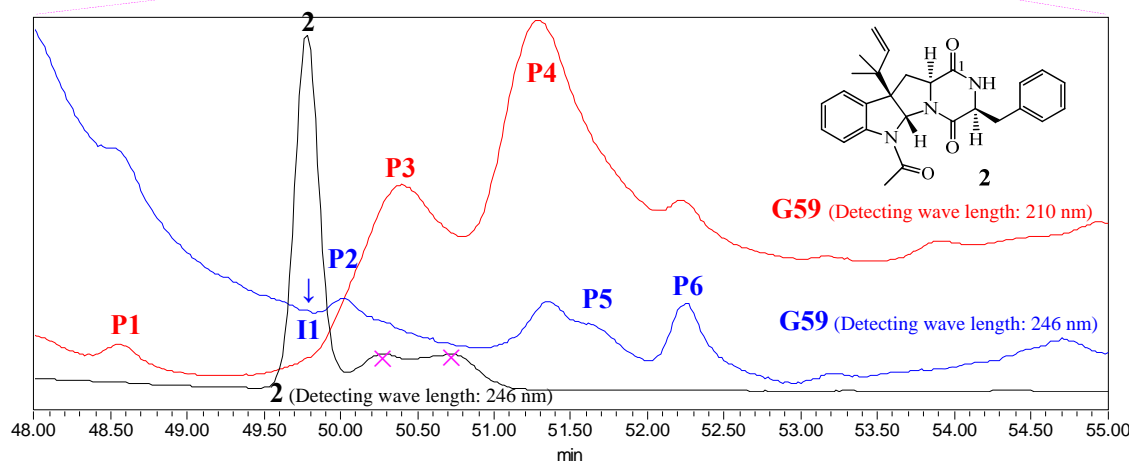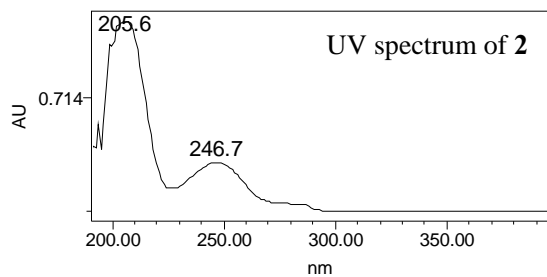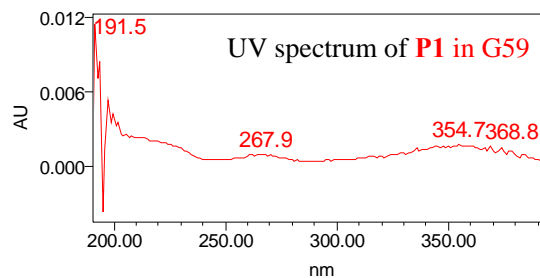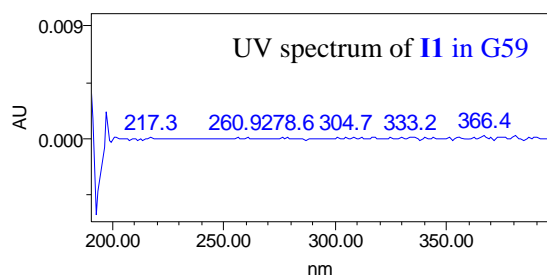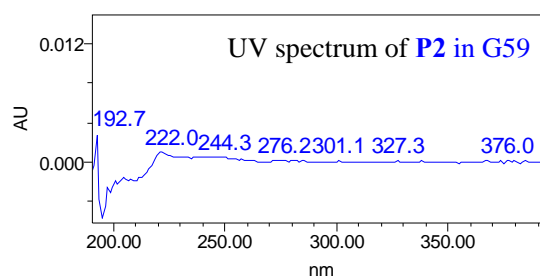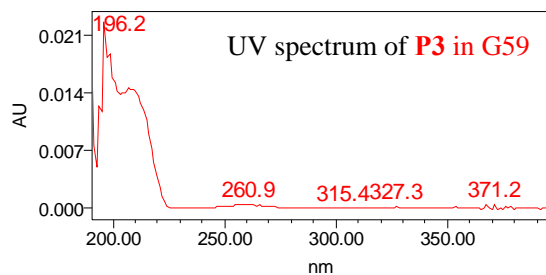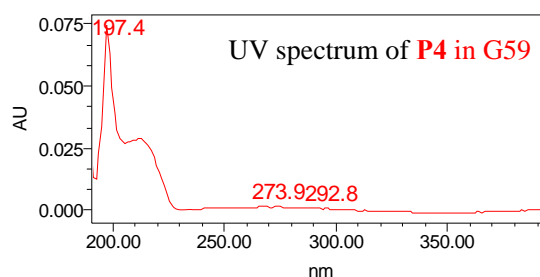

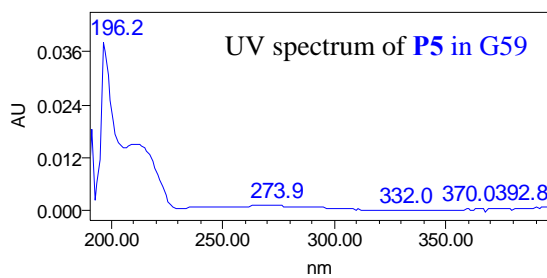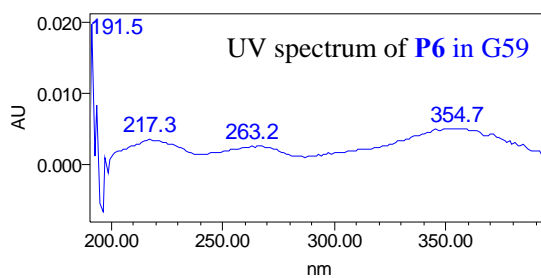

### 2.3 HPLC analysis for compound **4** by comparison with the EtOAc extract of G59 culture

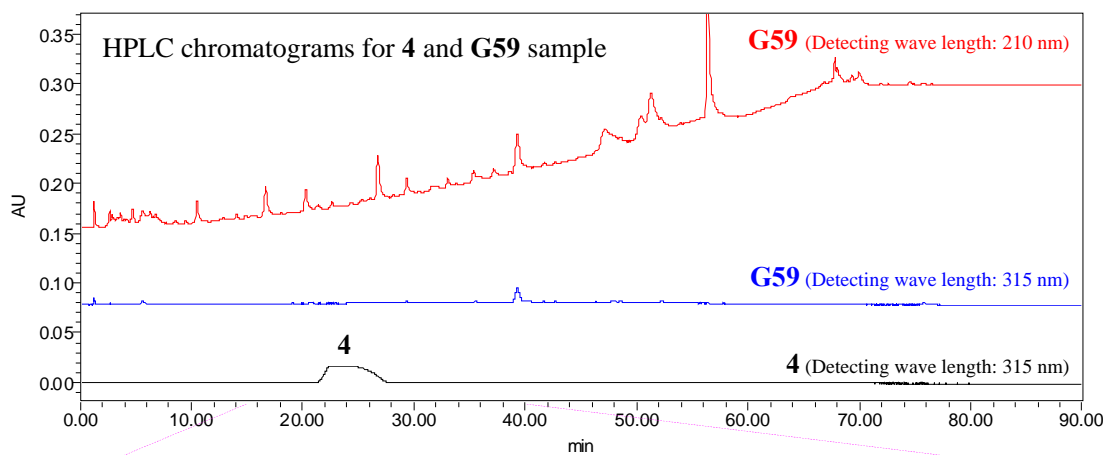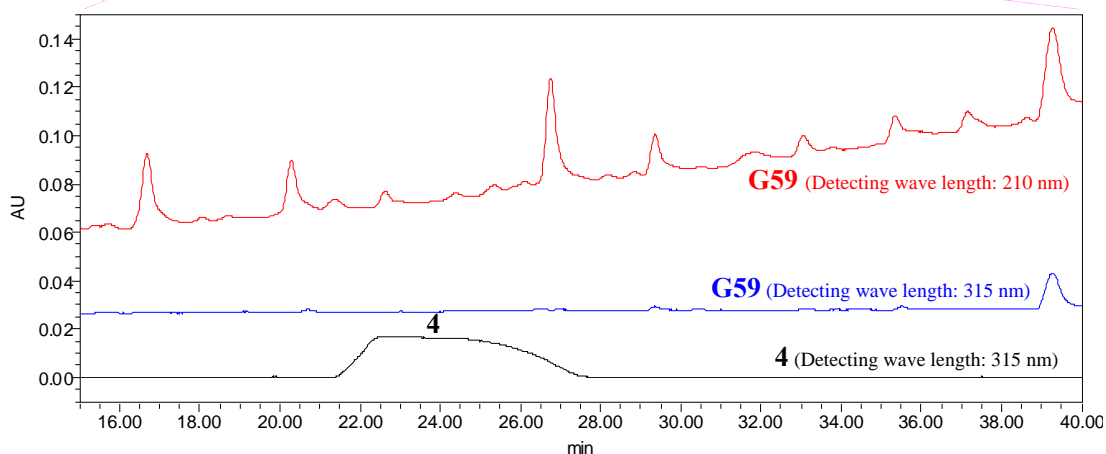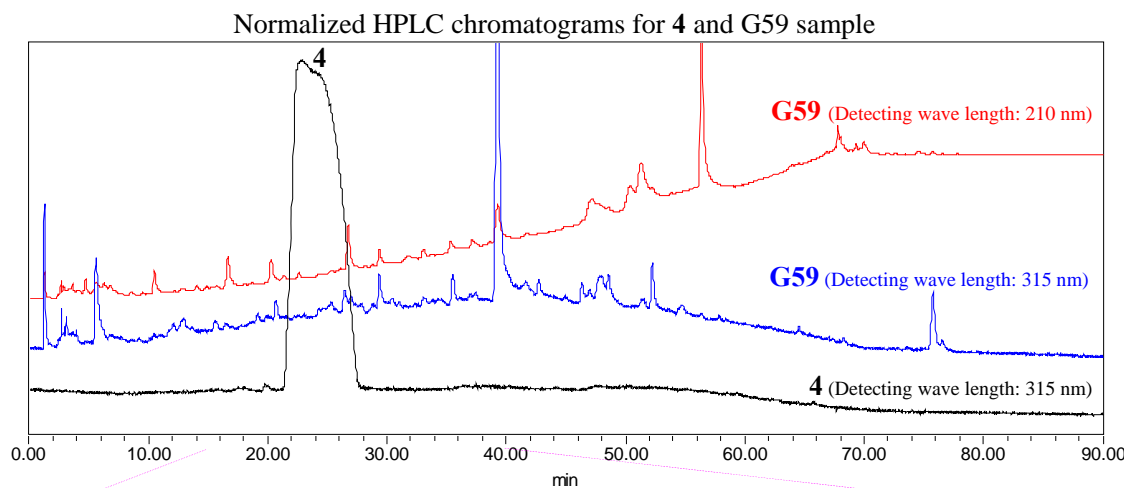

Expanded chromatograms see in next page

Expansion of normalized HPLC chromatograms for **4** and **G59** sample

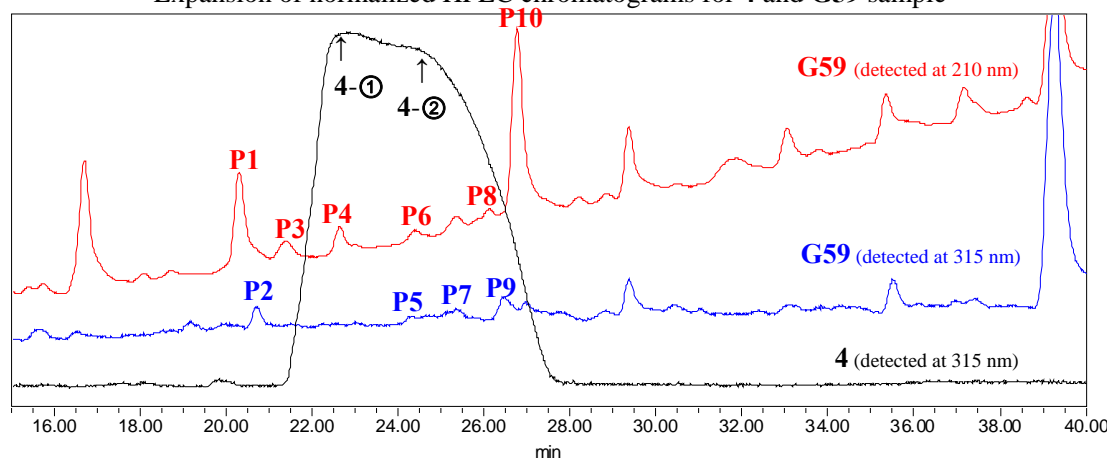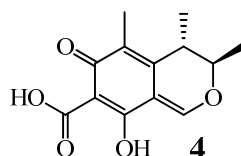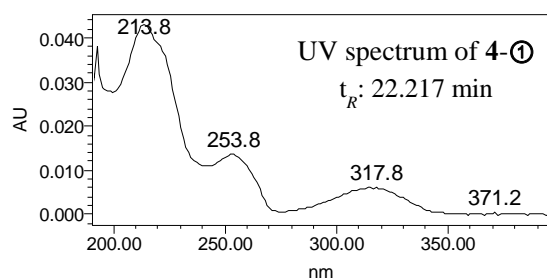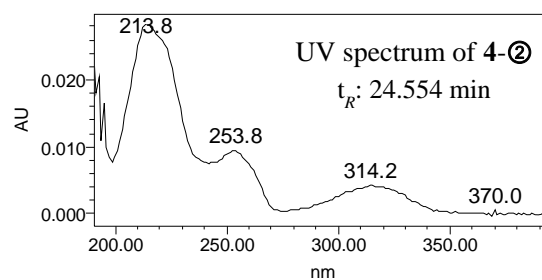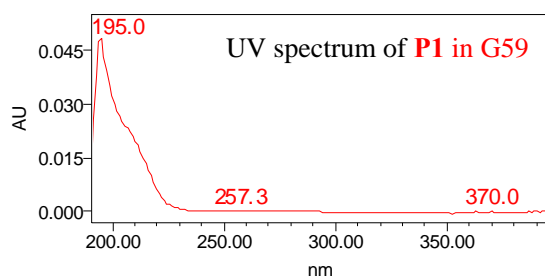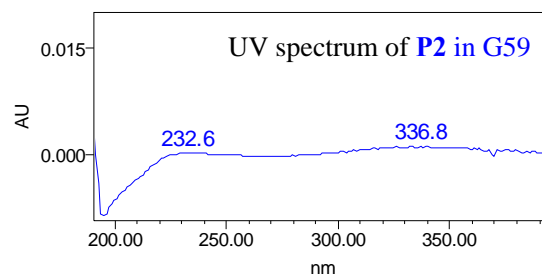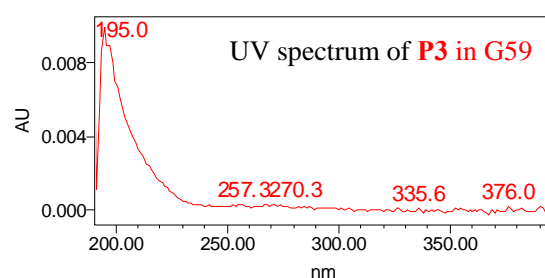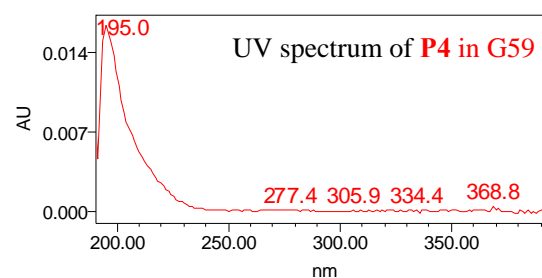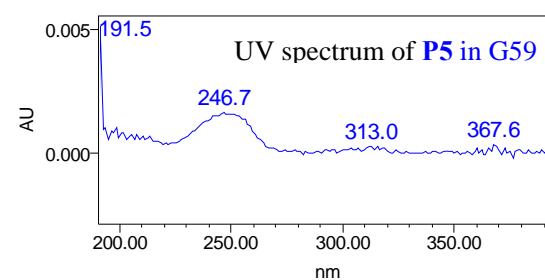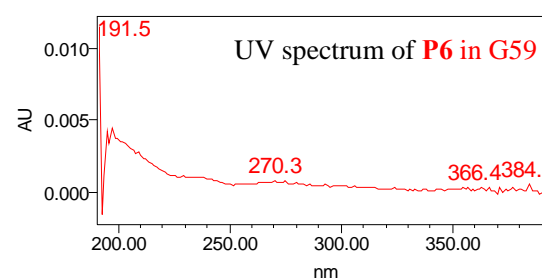

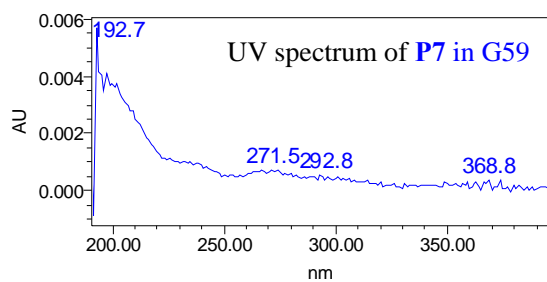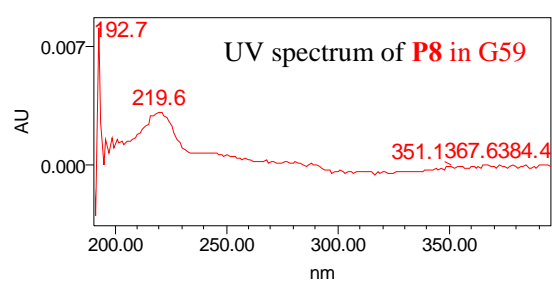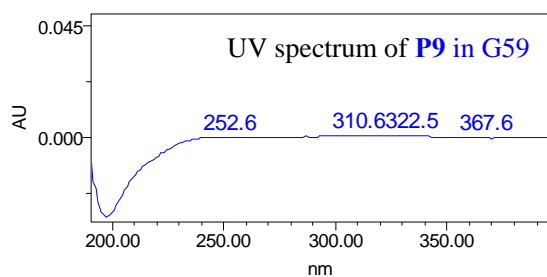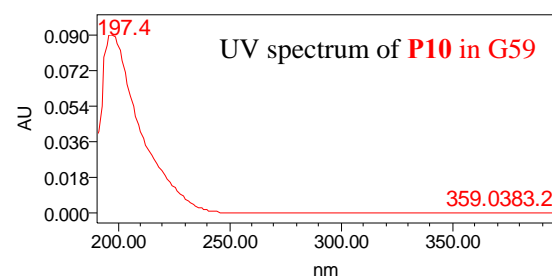

#### 2.4 HPLC analysis for compound **5** by comparison with the EtOAc extract of G59 culture

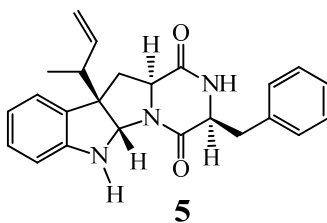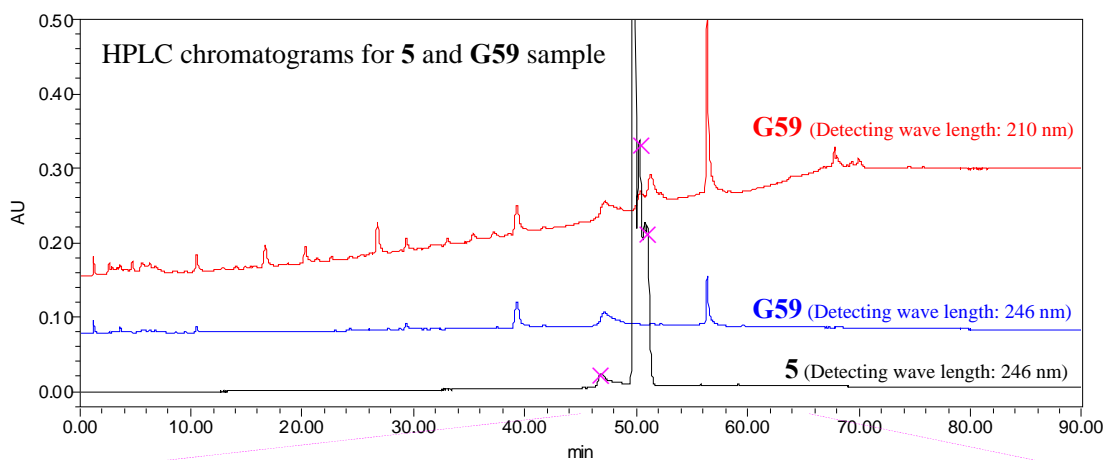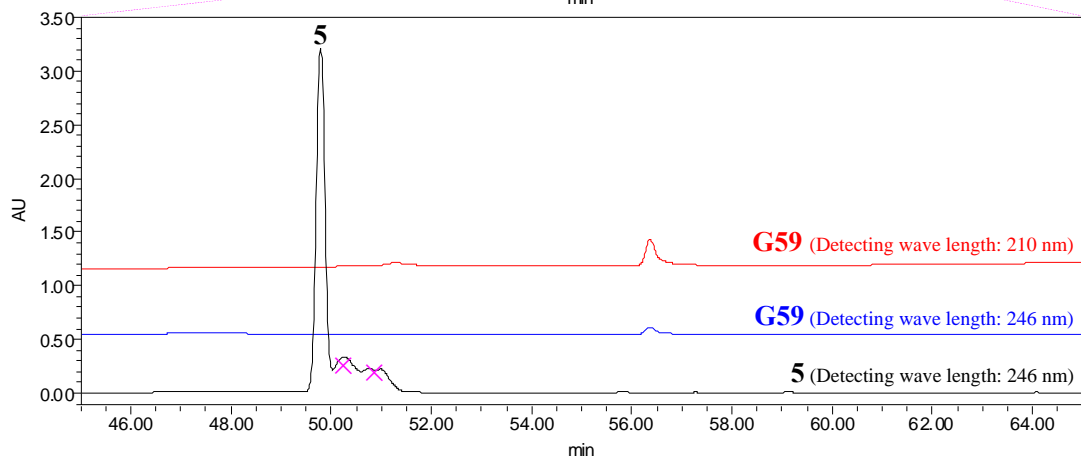

Normalized HPLC chromatograms for **5** and **G59** sample

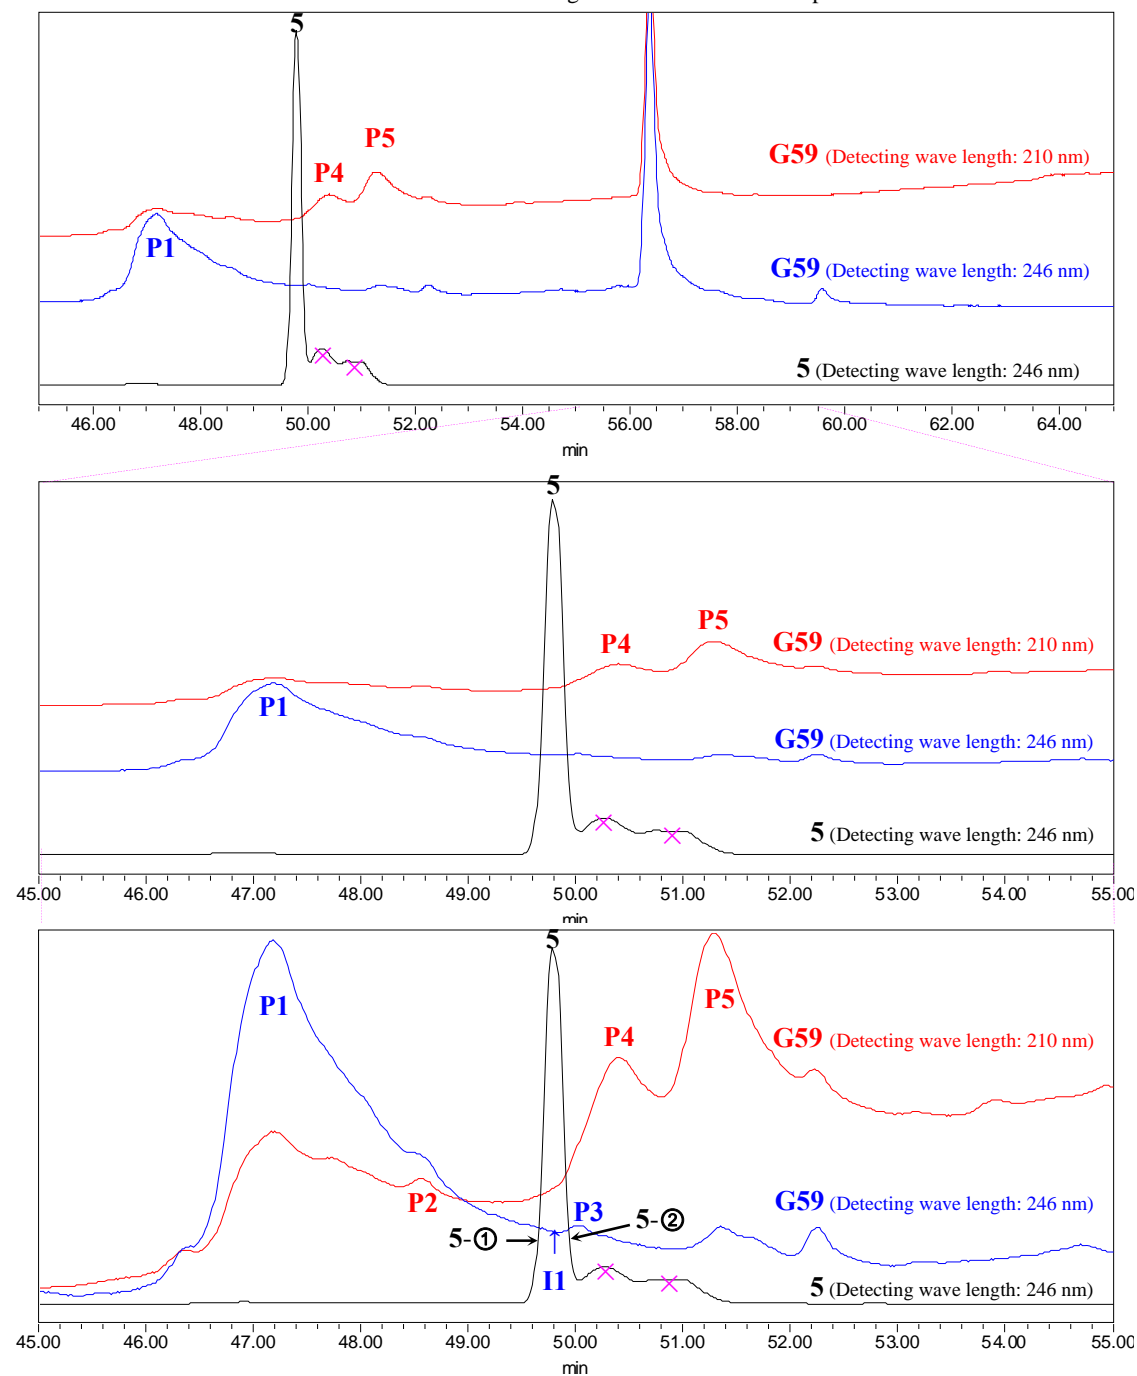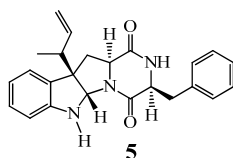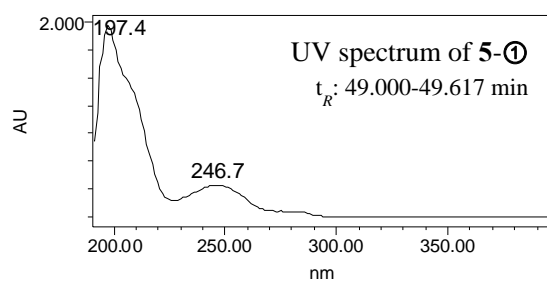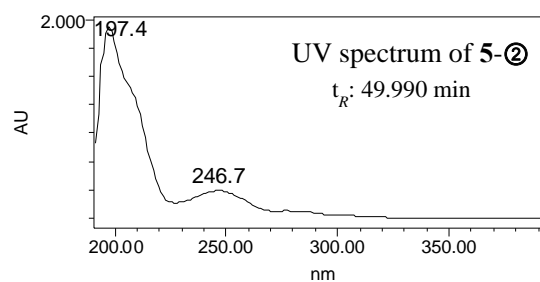



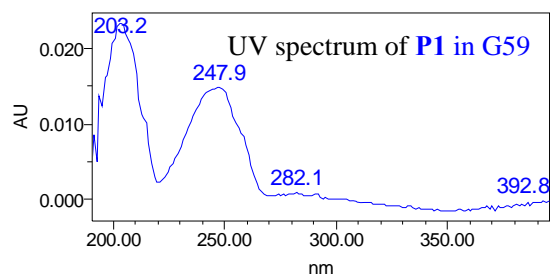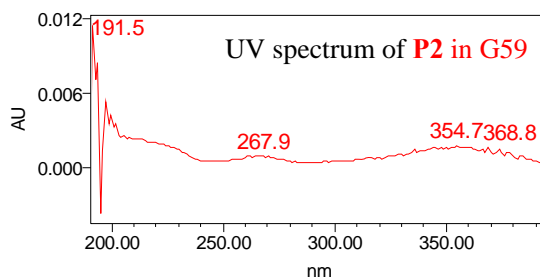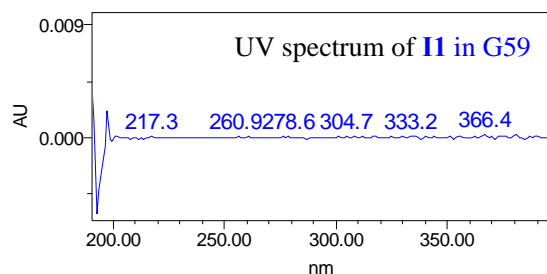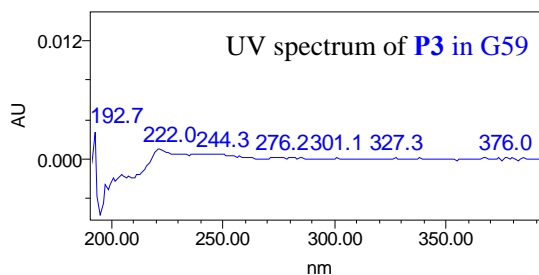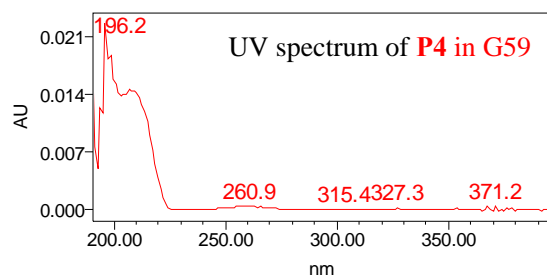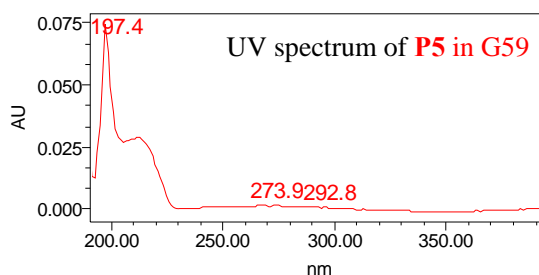

## 2.5 HPLC analysis for compound **6** by comparison with the EtOAc extract of G59 culture

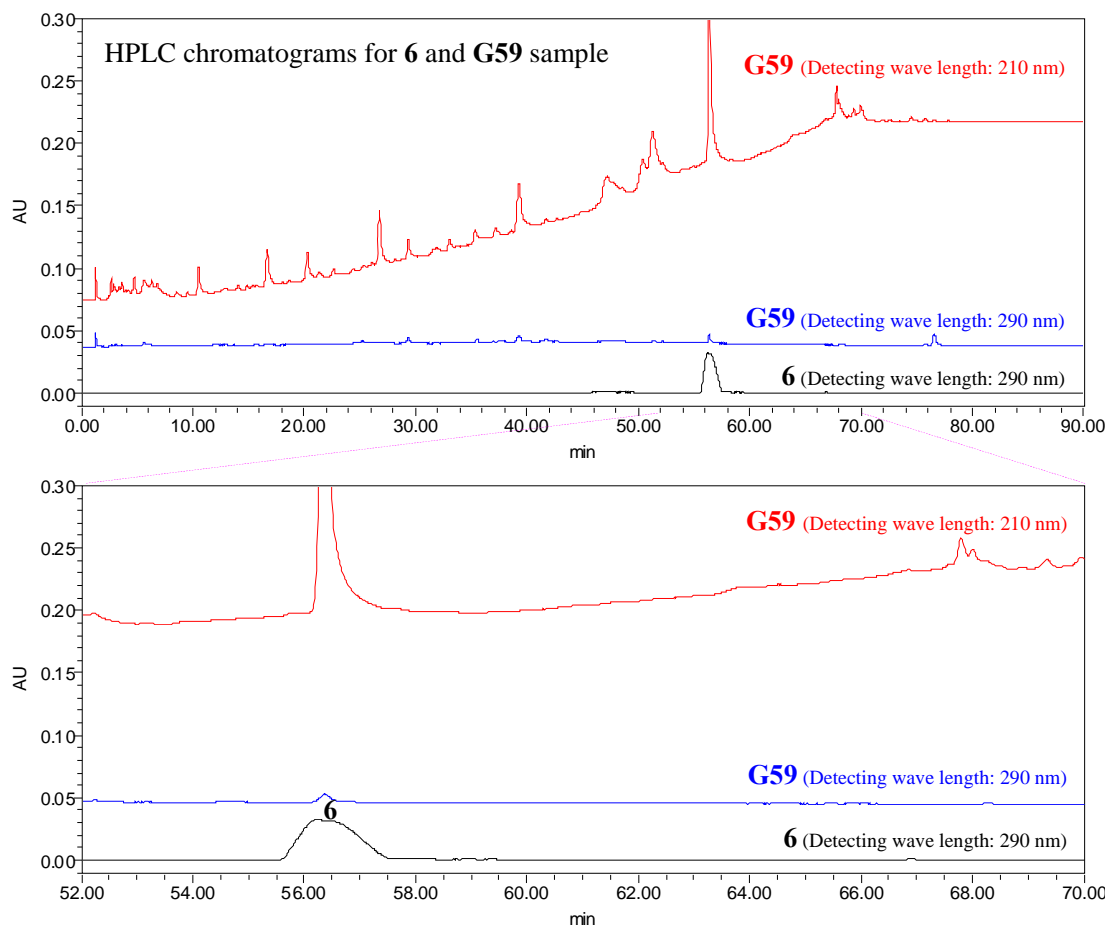

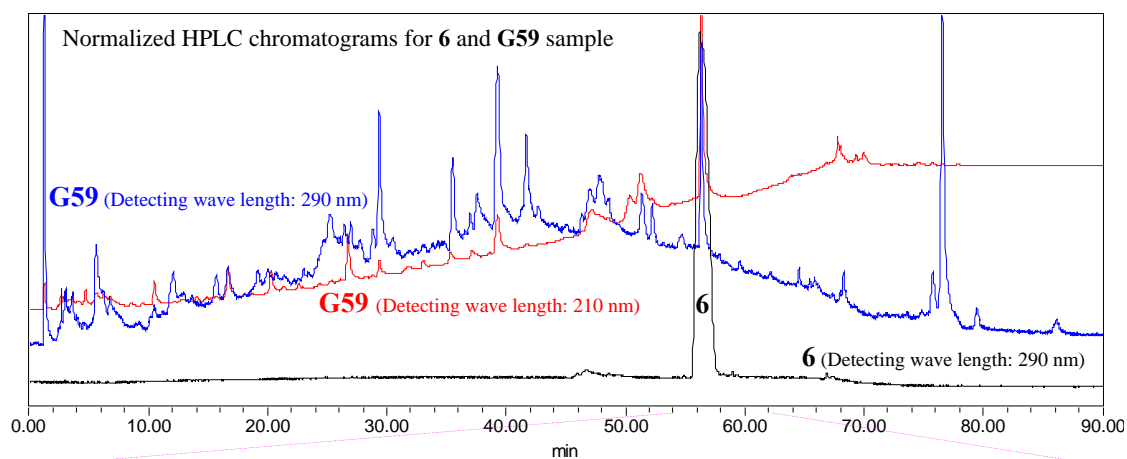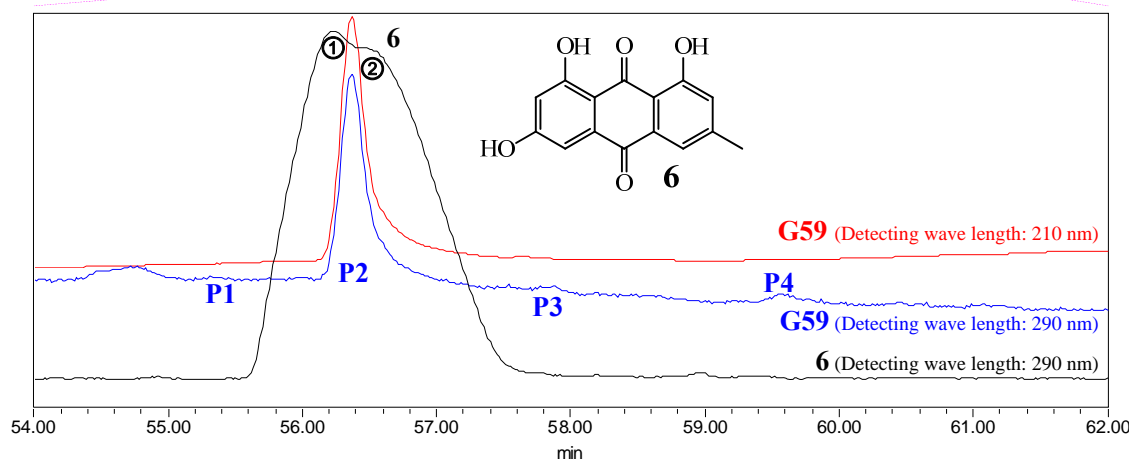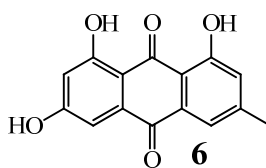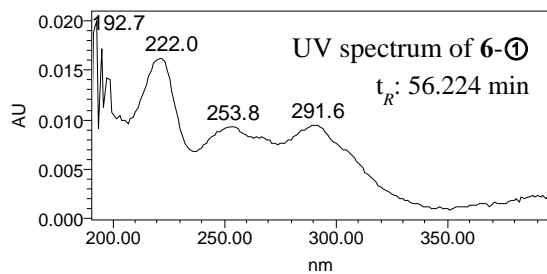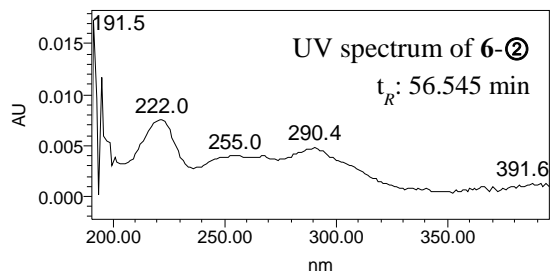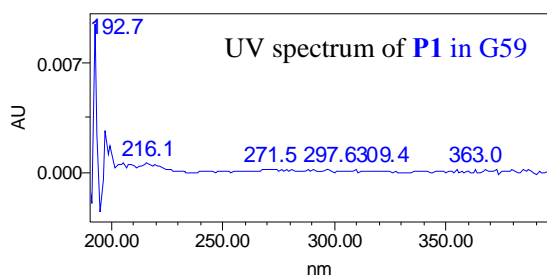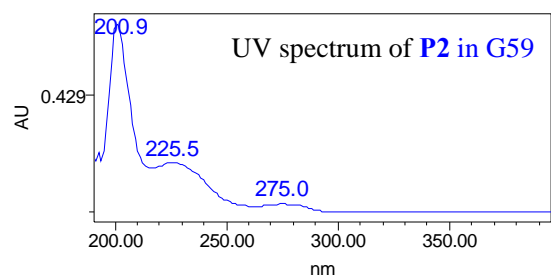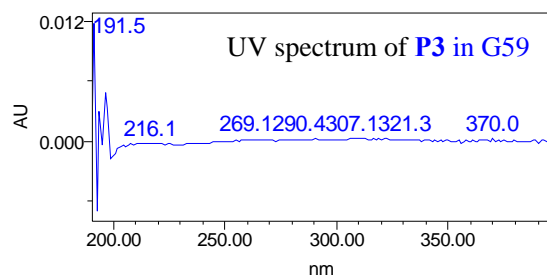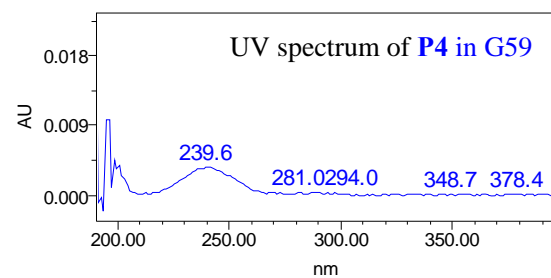

## 2.6 HPLC analysis for compound **7** by comparison with the EtOAc extract of G59 culture

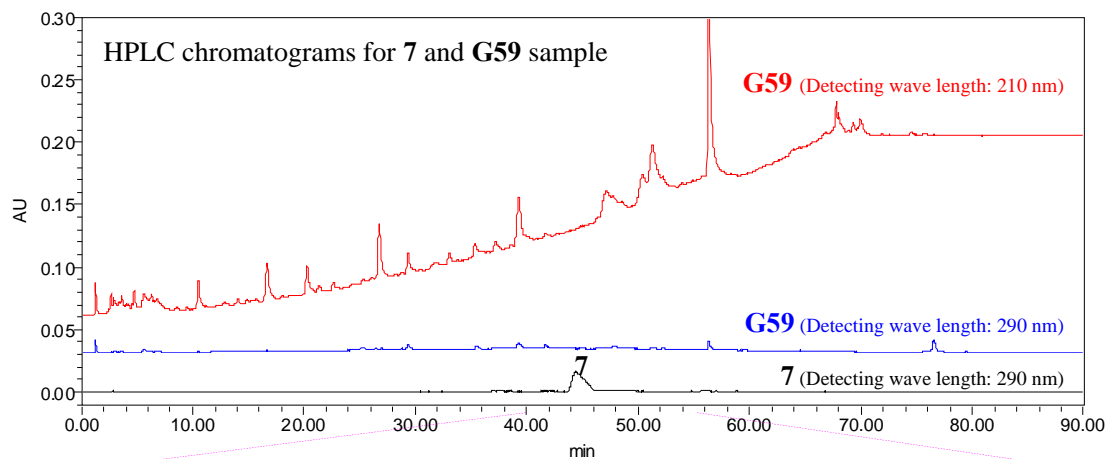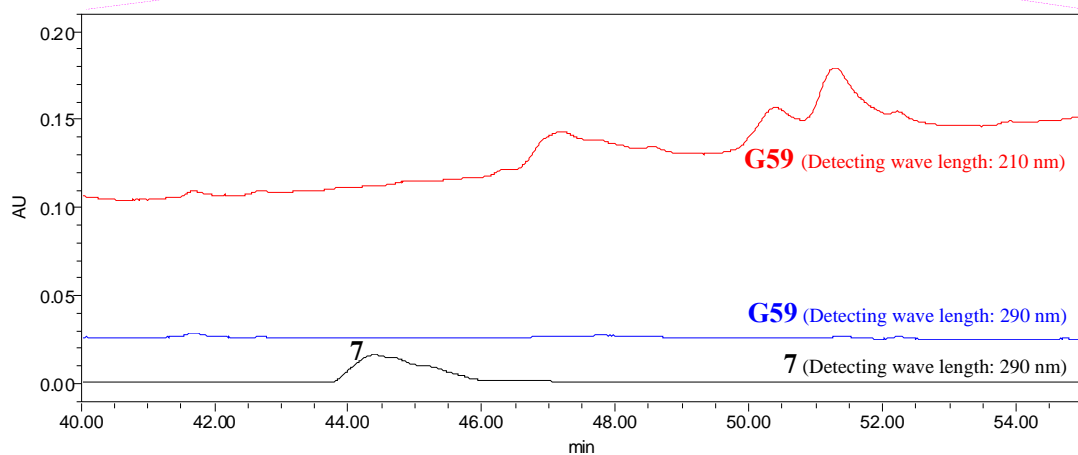

### Normalized HPLC chromatograms for **7** and G59 sample

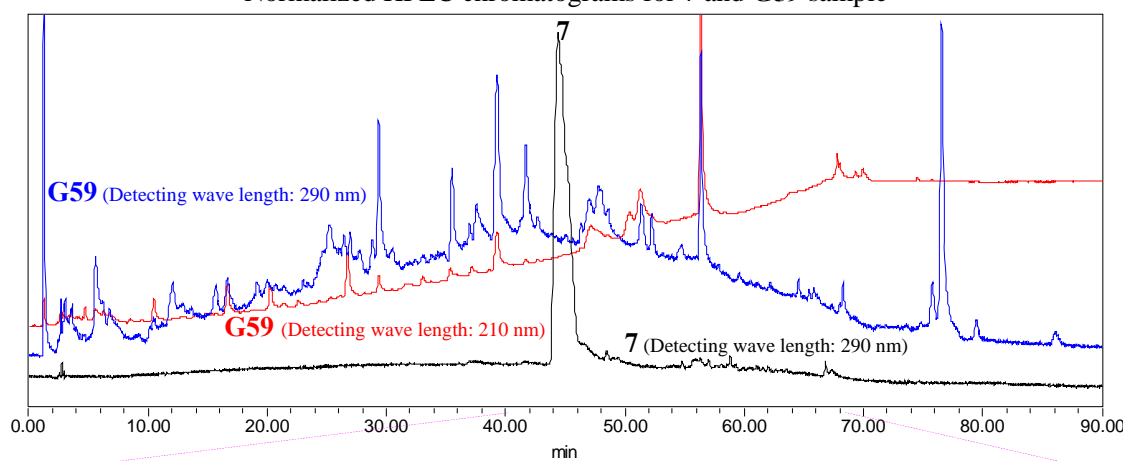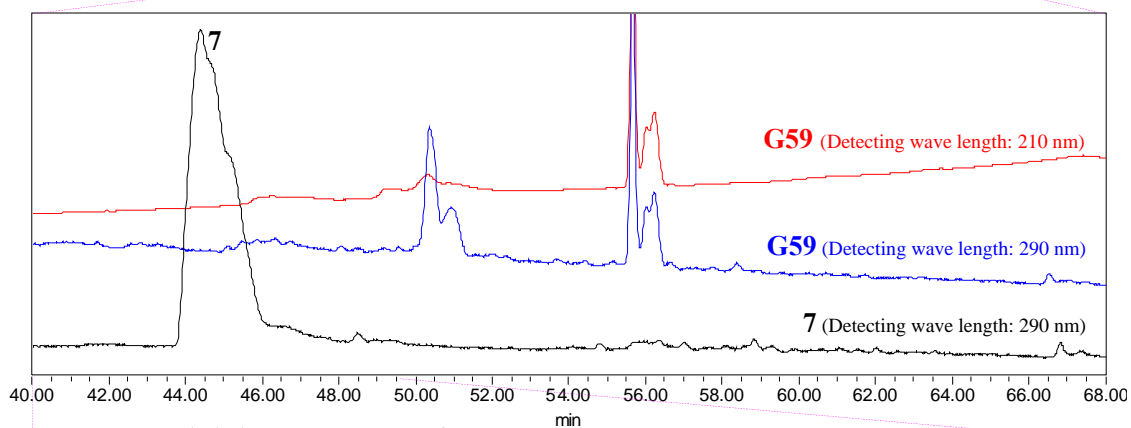

Expanded chromatograms see in next page

Expansion of normalized HPLC chromatograms for **7** and **G59** sample

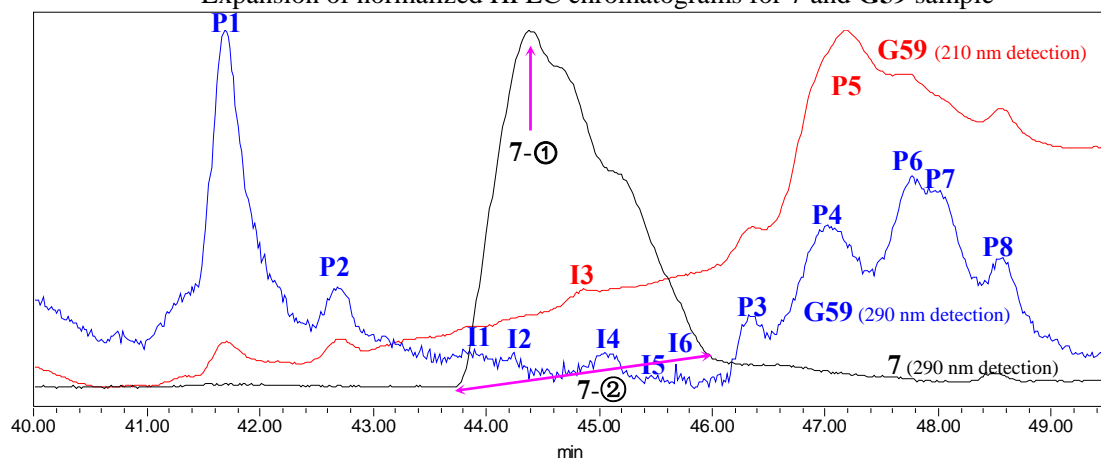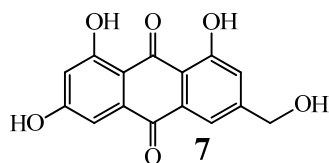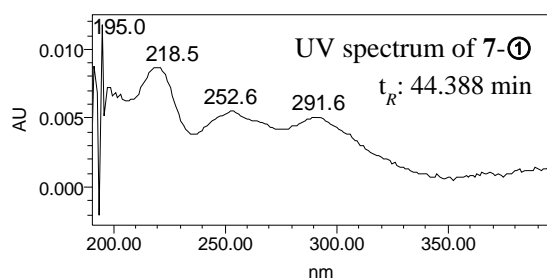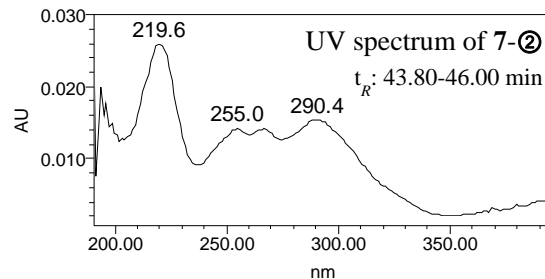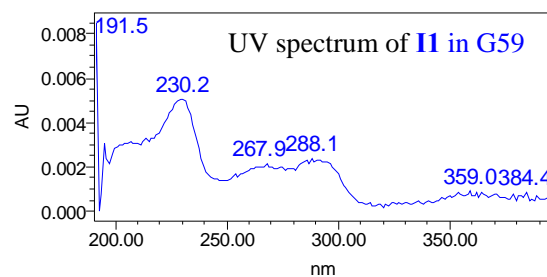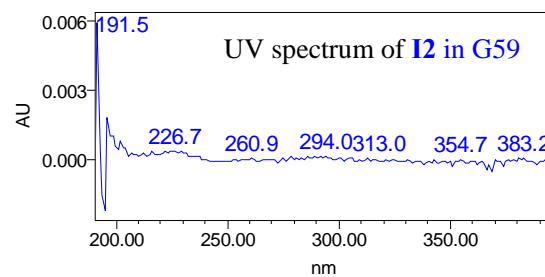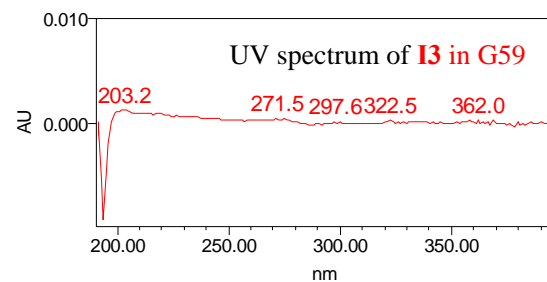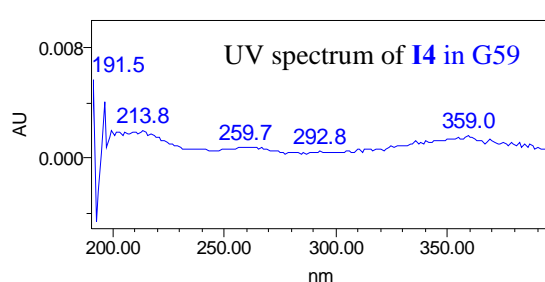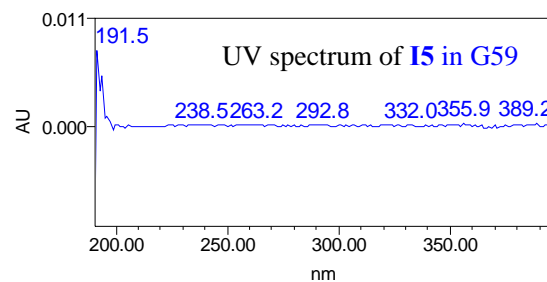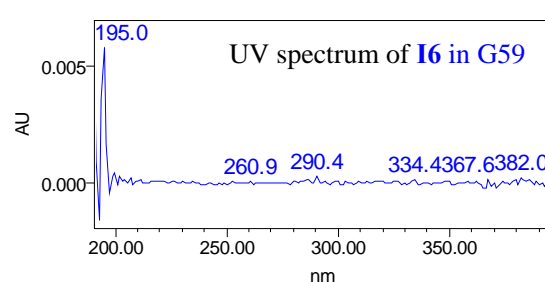

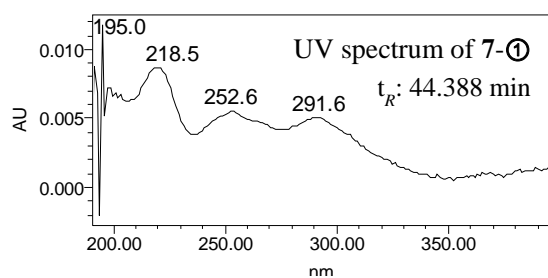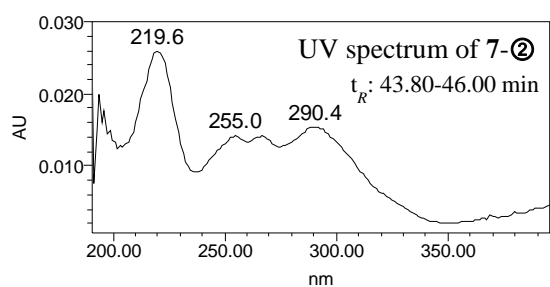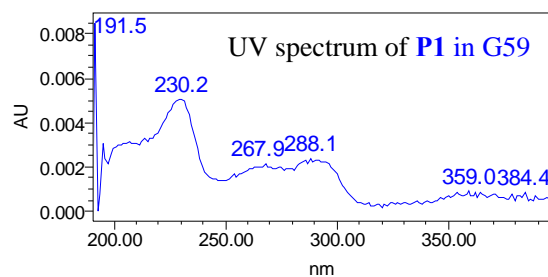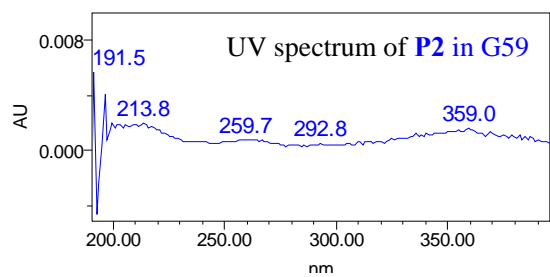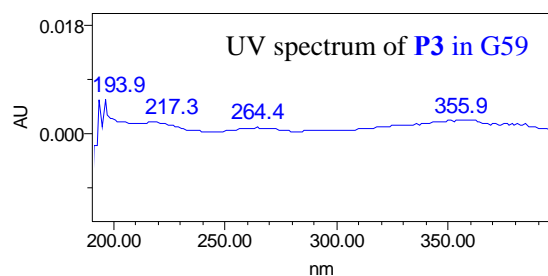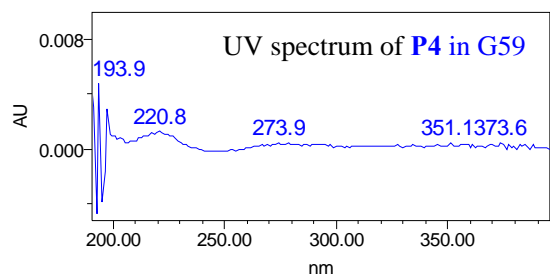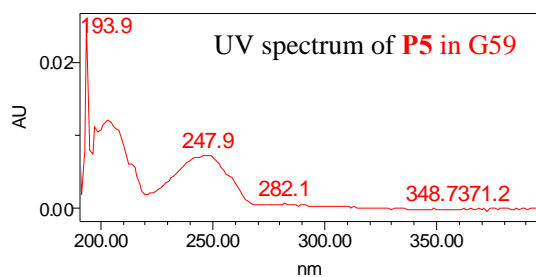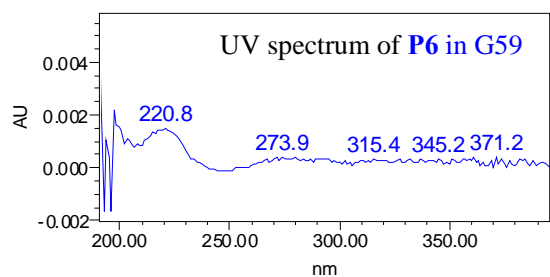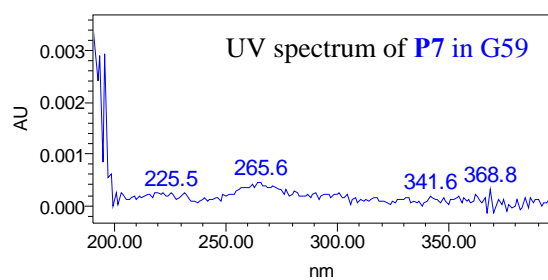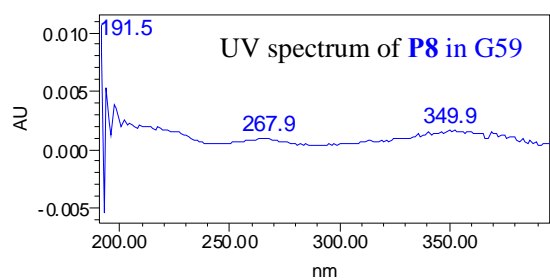

Supplement: s1 [file s1]
